# Supplementary material for: From Delivery to Adoption of Physical Activity Guidelines: Realist Synthesis
Source: Int J Environ Res Public Health. 2017 Oct 8;14(10):1193. doi: 10.3390/ijerph14101193 (PMC5664694; doi:10.3390/ijerph14101193)
Supplement: Supplementary file 1 [file ijerph-14-01193-s001.xlsx]

## Sheet: Foglio1
Database Physical Activity Guidance review
Article: authors, title, Journal	Year	Type of paper	Selected for review	Cycling Walking	Role of the context and Environment	Park/ built environment	Knowledge dissemination / translation	Excluded
Aarts MJ, Schuit AJ, Van de Goor IAM, van Hpers HAM: Feasibility of multi-sector policy measures that create activity-friendly environments for children: results of a Delphi study Implement Sci 2011, 6:128. doi: 10.1186/1748-5908-6-128.	2011	Evaluation	1			1
Abel T, Frohlich KL.Capitals and capabilities: Linking structure and agency to reduce health inequalities.Soc Sci Med. 2011 Dec 7.	2011	Theory Article
Active ageing: a policy framework. Geneva, World Health Organization, 2002 (http://whqlibdoc.who. int/hq/2002/WHO_NMH_NPH_02.8.pdf).	2002	Other
Addiss S.S, Community-Based Public Health: A Partnership Model. Journal of Public Health Policy22. 4 (2001): 468.	2001	Theory Article
Agranoff, Robert;Managing within Networks: Adding Value to Public Organizations; 2007, Washington, DC : Georgetown University Press. Document Type: book; (AN MWNAVPO.AGRANOFF.GEORGETOWNUNIVERSITYPRESS.BJJG) [Citation Record]	2007	Other
Aiello A,Ardone RG, Scopelliti M, Neighbourhood planning improvement: Physical attributes, cognitive and affective evaluation and activities in two neighbourhoods in Rome. Evaluation and Program Planning, 33(3), 2010, 264-275.	2010	Other
Ainsworth BE, Caspersen CJ, Matthews CE, Mâsse LC, Baranowski T, Zhu W., Recommendations to improve the accuracy of estimates of physical activity derived from self report. J Phys Act Health. 2012 Jan;9 Suppl 1:S76-84.	2012	Method
Allender S, Cavill N, Parker M, Foster C: ‘Tell us something we don’t already know or do!’ The response of planning and transport professionals to public health guidance on the built environment and physical activity. J Public Health Policy 2009, 30:102-116. doi: 10.1057/jphp.2008.43.	2009	Evaluation				1
Allender S, Cowburn G, C, Foster, Understanding participation in sport and physical activity among children and adults: a review of qualitative studies. HEALTH EDUCATION Research. 2006;21(6): 826–835.	2006	Review
Allender S, Gleeson E, Crammond B, Sacks G, Lawrence M, Peeters A et al: Policy change to create supportive environments for physical activity and healthy eating: which options are the most realistic for local government? Health Promot Int 2011, 7:261-274. doi: 10.1093/heapro/dar018.	2011	Evaluation	1			1
Alvaro C, Lyons RF, Warner G, Hobfoll SE, Martens PJ,Labonté R, Brown RE, Conservation of resources theory and research use in health systems, Implementation Science 2010, 5:79 http://www.implementationscience.com/content/5/1/79	2010	Theory Article
Alvaro C., L. A. Jackson, S. Kirk, T. L. McHugh, J. Hughes, A. Chircop, R. F. Lyons, Moving Canadian governmental policies beyond a focus on individual lifestyle: some insights from complexity and critical theories. Health Promot. Int. (2011) 26(1): 91-99 first published online August 13, 2010 doi:10.1093/heapro/daq052	2010	Theory Article			x
American College of Sports Medicine, Chodzko-Zajko WJ, Proctor DN, Fiatarone Singh MA, Minson CT, Nigg CR., et al: American College of Sports Medicine position stand. Exercise and physical activity for older adults. Med Sci Sports Exerc 2009, 41(7):1510-1530. doi: 10.1249/MSS.0b013e3181a0c95c.	2009	Guidance
Anable, J; Lane, B and Kelay, T AN EVIDENCE BASE REVIEW OF PUBLIC ATTITUDES TO CLIMATE CHANGE AND TRANSPORT BEHAVIOUR . DfT 2006 http://assets.dft.gov.uk/publications/pgr-sustainable-reviewtransportbehaviourclimatechange-pdf/iewofpublicattitudestocl5730.pdf	2006	Review
Anderies, J.M., M.A. Janssen, and E. Ostrom. 2004. A framework to analyze the robustness of social-ecological systems from an institutional perspective. Ecology and Society 9(1):18. http://www.ecologyandsociety.org/vol9/iss1/art18/.	2004	Theory Article
Angevaren Maaike, Aufdemkampe Geert, Verhaar HJJ, Aleman A , Vanhees Luc. Physical activity and enhanced fitness to improve cognitive function in older people without known cognitive impairment. Cochrane Database of Systematic Reviews: Reviews 2008 Issue 3 John Wiley & Sons, Ltd Chichester, UK DOI: 10.1002/14651858.CD005381.pub3 http://www.mrw.interscience.wiley.com/cochrane/clsysrev/articles/CD0…	2008	Systematic Review
Armitage CJ.Can the theory of planned behavior predict the maintenance of physical activity? Health Psychol. 2005 May;24(3):235-45.	2005	Theory Article
Armitage D, Governance and the commons in a multi-level world. International Journal of the Commons. 2008;2(1); 7-32. http://www.thecommonsjournal.org	2008	Theory Article			x
Armitage, D. (2007). Governance and the Commons in a Multi-Level World. Governance and the Commons in a Multi-Level World. International Journal of the Commons 2(1):7-32.Retrieved from http://www.thecommonsjournal.org/index.php/ijc/article/view/28/16	2007	Theory Article
Armstrong R, Doyle J, Lamb C, Waters E, Multi-sectoral health promotion and public health: the role of evidence. Journal of Public Health,Vol. 28, No. 2, pp. 168–172 doi:10.1093/pubmed/fdl013	2006	Evaluation
Armstrong T, Physical activity policies:perspectives from the implementation of the WHO Global Strategy on Diet,Physical Activity and Health,Coordinator,Surveillance and Population-based Prevention WHO, Spain March 2009.	2009	Guidance			x
Ashe M, S. Graff, C. Spector, Changing places: Policies to make a healthy choice the easy choice.Public Health - December 2011 (Vol. 125, Issue 12, Pages 889-895, DOI: 10.1016/j.puhe.2011.04.010)	2011	Other				1
Ashworth Nigel L, Chad Karen E, Harrison Elizabeth L, Reeder Bruce A, Marshall Shawn C. Home versus center based physical activity programs in older adults. Cochrane Database of Systematic Reviews: Reviews 2005 Issue 1 John Wiley & Sons, Ltd Chichester, UK DOI: 10.1002/14651858.CD004017.pub2 http://www.mrw.interscience.wiley.com/cochrane/clsysrev/articles/CD004017/frame.html	2005	Systematic Review
Association of Local Government, Local Strategic Partnerships and Neighbourhood Renewal in London: the story so far Association of Local Government, Greater London Enterprise in Renewal (2003)	2003	Other
Attalin V, Romain AJ, Avignon A: Physical-activity prescription for obesity management in primary care: Attitudes and practices of GPs in a southern French city. Diabetes Metab 2012, 38(3):243-249. doi: 10.1016/j.diabet.2011.12.004.	2012	Evaluation	1
Attreea P, Claytonb S, Karunanithic S, Nayakc S, Popaya J, Read D, NHS health trainers: a review of emerging evaluation evidence.Critical Public Health, Vol. 22, No. 1, March 2012, 25–38	2012	Review
Atun R, Thyra de Jongh, Federica Secci, Kelechi Ohiri, and Olusoji Adeyi Integration of targeted health interventions into health systems: a conceptual framework for analysis Health Policy Plan. (2010) 25(2): 104-111 first published online November 16, 2009 doi:10.1093/heapol/czp055	2010	Theory Article
Auspos P, Kubisch A (2004) Building knowledge about community change – moving beyond evaluations. Washington:The Aspen institute Roundtable on Community Change.	2004	Theory Article					1
Australia’s Physical Activity Recommendations for 12–18 Year olds [brochure]. Australian Government Department of Health and Ageing, 2005. (http://www.health.gov.au/internet/main/publishing.nsf/Content/0D0EB17A5B838081CA256F9700136F60/$File/youth_phys.pdf, accessed 23 February 2010).	2005	Guidance
Australian Government Working together for a Healthy Active Australia http://www.healthyactive.gov.au/internet/healthyactive/publishing.nsf/Content/home Last accessed 30-May-2016	2016	Plan
Australian Local Government Association, National Heart Foundation of Australia, International Association of Public Transpor, An Australian Vision for Active Transport. A report prepared by Australian Local Government Association, Bus Industry Confederation, Cycling Promotion Fund, National Heart Foundation of Australia, International Association of Public Transport. 2010.http://www.heartfoundat…	2010	Plan			x
Ayala, G.X. (2008, May). Culture-Based Physical Activity Research: Guidelines and Strategies (pdf). Symposium at the American College of Sports Medicine entitled: Developing, Implementing and Evaluating Culturally Tailored Interventions to Promote Physical Activity in Diverse Communities (moderator: Evelyn Kelly), Indianapolis, IN. www.sdprc.org/miscfiles/acsm-ayala.pdf	2008	Guidance
Babey S, Hastert TA, Yu H, Brown eR. Physical activity among adolescents: When do parks matter? Am J Prev Med. 2008; 34(4): 345–348.	2008	Other				1
Babey SH, Brown ER, Hastert TA. Access to safe parks helps increase physical activity among teenagers. Los Angeles CA: UCLA Center for Health Policy Research; 2005	2005	Guidance				1
Bäcklund, C., Sundelin, G., Larsson, C. , Effects of a 2-year lifestyle intervention on physical activity in overweight and obese children.2011; Advances in Physiotherapy 13 (3), pp. 97-109.	2011	Evaluation
Baggott R., Public health and policy sucess in England Journal of Social Policy,2012, Vol 41(2): 391-408.	2012	Evaluation
Bailey R, Hillman C, Arent S, and Petitpas A: Physical activity as an investment in personal and social change: the Human Capital Model. J Phys Activ Health 2013, 9, 1053-1055.	2013	Method	1
Baker Philip RA, Francis Daniel P, Soares Jesus, Weightman Alison L, Foster Charles. Community wide interventions for increasing physical activity. Cochrane Database of Systematic Reviews: Reviews 2011 Issue 4 John Wiley & Sons, Ltd Chichester, UK DOI: 10.1002/14651858.CD008366.pub2	2011	Systematic Review
Balandraux-Olivet M, Mäder U, Ulrich U (eds) Transport related health impacts—costs and benefits with a particular focus on children. Transnational project and workshop series of Austria, France, Malta, Sweden, Switzerland and the Netherlands. Topic report physical activity. Contribution to the UNECE- WHO Pan-European Programme for Transport, Health and Environment—THE PEP (report on the Internet…	2006	Other		WC		1
Barbara L Riley, JoAnne MacDonald, Omaima Mansi, Anita Kothari, Donna Kurtz, Linda I vonTettenborn, Nancy C Edwards , Is reporting on interventions a weak link in understanding how and why they work? A preliminary exploration using community heart health exemplars.Implementation Science 2008, 3:27	2008	Evaluation
Barbier, Jean Claude (2012) ‘Introduction: EU Law, Governance and Social Policy’, in: Barbier, Jean- Claude (ed.) EU Law, Governance and Social Policy, European Integration online Papers (EIoP), Special Mini-Issue 1, Vol. 16, http://eiop.or.at/eiop/pdf/2012-SpecIssue-1_Introduction.pdf.	2012	Other
Barnes M, MacLean J, Cousens L, Understanding the structure of community collaboration: the case of one Canadian health promotion network. Health Promot. Int. 2010 25: 238-247.	2010	Evaluation
Barnett-Page, E, and Thomas, J: Methods for the synthesis of qualitative research: a critical review. BMC Med Res Methodol 2009, 9:59. doi: 10.1186/1471-2288-9-59.	2009	Review			x
Bartholomew K., Intervention Mapping: Facilitating the Use of Theory and Evidence Planning, 2008 Download Presentation (PDF-3.62 MB)	2008	Review
Barton H, Land use planning and health and well-being. Land Use Policy 26S (2009) S115–S123	2009	Theory Article
Barton, H. and Grant, M. (2012) Urban planning for healthy cities: review of the progress of the European Healthy Cities Programme. To be published in Journal of Urban Health. ISSN 1099-3460 [In Press] . http://dx.doi.org/10.1007/s11524?011?9649?3	2012	Review
Bashiri M, Seyed-Ameri MH, Moharramzadeh M and Hadi H, Evaluation of Sport Sponsorship: As An Element of Sport Marketing Mix International Review of Business Research Papers Vol.6, No.1 February 2010, Pp. 57-74	2010	Evaluation
Batik O, Phelan EA, Walwick JA, Wang G, LoGerfo JP. Translating a community-based motivational support program to increase physical activity among older adults with diabetes at community clinics: a pilot study of Physical Activity for a Lifetime of Success (PALS). Prev Chronic Dis. 2008 Jan;5(1):A18. Epub 2007 Dec 15.	2008	Evaluation
Bauman A, Bellew B, Vita P, Brown W, Owen N. Getting Australia active: towards better practice for the promotion of physical activity. National Public Health Partnership. Melbourne, Australia, March, 2002 http://www.dlg.nsw.gov.au/DLG/Documents/information/Getting%20Australia%20Active.pdf	2002	Guidance
Bauman A. The physical environment and physical activity: moving from ecological associations to intervention evidence. J Epidemiol Community Health 2005;59:535-536 doi:10.1136/jech.2004.032342	2005	Method			x	1
Bauman AE (2004). Updating the evidence that physical activity is good for health: an epidemiological review 2000–2003. Journal of Science and Medicine in Sport, Physical Activity Suppl, 7(1):6–19. )	2004	Systematic Review			x
Bauman AE, Bull FC, Environmental correlates of physical activity and walking in adults and childre: a review of review, February 2007 http://www.gserve.nice.org.uk/nicemedia/live/11679/34740/34740.pdf	2007	Review				1
Bauman AE, Sallis JF, Dzewaltowski DA, Owen N: Toward a better understanding of the influences on physical activity: the role of determinants, correlates, causal variables, mediators, moderators, and confounders. Am J Prev Med 2002, 23(Suppl 2):5–14.	2002	Method
Bauman, A E.; Nelson, David E.; Pratt, M; Matsudo V; Schoeppe, Stephanie pp. 57-65 Dissemination of Physical Activity Evidence, Programs, Policies, and Surveillance in the International Public Health Arena. Am J Prev Med 2006;31(4S):S57-S65.	2006	Theory Article
Bauman, A. E., & Nutbeam, D. (2006). Evaluation in a nutshell: A practical guide to the evaluation of health promotion programs. Sydney, New South Wales, Australia: McGraw-Hill.	2006	Method
Be Active Your Way: A Guide for Adults. Based on the 2008 Physical Activity Guidelines for Americans. ODPHP Publication No. U0037. Office of Disease Prevention & Health Promotion, US Department of Health and Human Services, October 2008. (http://www.health.gov/paguidelines/pdf/adultguide.pdf, accessed 11 January 2010).	2008	Guidance
Beaglehole R et al. Priority actions for the non-communicable disease crisis, www.thelancet.com Published online April 6, 2011 DOI:10.1016/S0140-6736(11)60393-0 http://www.oecd.org/dataoecd/15/9/47531330.pdf	2011	Other
Bélanger M, Casey M, Cormier M, Laflamme Filion A, Martin G, Aubut S, Chouinard P, Savoie P, Beauchamp J, Maintenance and decline of physical activity during adolescence: insights from a qualitative study. Int J Behav Nutr Phys Act. 2011; 8: 117	2011	Other
Bélanger, M., Casey, M. ,Cormier, M., Beauchamp, J. , Maintenance and decline of physical activity during adolescence: insights from a qualitative study. Int J Behav Nutr Phys Act. 2011; 8: 117. doi: 10.1186/1479-5868-8-117	2011	Evaluation
Bellew B, Schöeppe S, Bull FC, Bauman A. The rise and fall of Australian physical activity policy 1996-2006: a national review framed in an international context . Aust New Zealand Health Policy. 2008; 5: 18. http://www.ncbi.nlm.nih.gov/pmc/articles/PMC2525635/	2008	Review
Bellow B, Schöeppe S, Bull FC, Bauman A. The rise and fall of Australian physical activity policy 1996 – 2006: a national review framed in an international context Aust New Zealand Health Policy. 2008; 5: 18. http://www.ncbi.nlm.nih.gov/pmc/articles/PMC2525635/	2008	Review
Benjamin A. Shaw, Linda S. Spokane, Examining the Association Between Education Level and Physical Activity Changes During Early Old Age. J Aging Health. 2008; 20(7): 767–787.	2008	Other
Benner T, Wolfgang H. Reinicke and Jan Martin Witte, Multisectoral Networks in Global Governance: Towards a Pluralistic System of Accountability.Government and Opposition Ltd 2004 Published by Blackwell Publishing, 9600 Garsington Road, Oxford OX4 2DQ, UK and 350 Main Street, Malden, MA 02148, USA.http://www.gppi.net/fileadmin/gppi/Multisectoral_Governance.pdf	2004							1
Berkes, F. 2008. Commons in a multi-level world. International Journal of the Commons 2(1):1-6. [online] http://www.thecommonsjournal.org/index.php/ijc/article/view/80/15	2008	Theory Article
Bernier N F, Clavier C, Public health policy research: making the case for a political science approach. Health Promot Int (2011) 26(1): 109	2011							1
Bero LA, Grilli R, Grimshaw JM, Harvey E, Oxman AD, Thomson MA: Closing the gap between research and practice: an overview of systematic reviews of interventions to promote the implementation of research findings. BMJ 1998, 317:465-468. | Publisher Full Text	1998	Systematic Review
Berry NM, Coffee NT, Nolan R, Dollman J, Sugiyama T. Neighbourhood Environmental Attributes Associated with Walking in South Australian Adults: Differences between Urban and Rural Areas. Int J Environ Res Public Health. 2017 Aug 26;14(9). pii: E965. doi: 10.3390/ijerph14090965.	2017	Other				1
Bess H. Marcus BH, Williams D M, Dubbert PM, Sallis JF, King AC, Yancey AK, Franklin BA, Buchner D, Stephen R. Daniels SR, Claytor RP, AHA Scientific Statements: Physical Activity Intervention Studies: What We Know and What We Need to Know: A Scientific Statement From the American Heart Association Council on Nutrition, Physical Activity, and Metabolism (Subcommittee on Physical Activity); Counci…	2006	Guidance
BHF National Centre, Well@Work - Summary report and call to action. 02/08/2008 / BHF This report explores the key findings of the national workplace health initiative; Well@Work	2008	Evaluation
BHF, Evaluation of the Physical Activity Pathway London Feasibility Pilot: Final Report. 01/12/2008 , Publisher: BHF National Centre	2008	Evaluation
Biddle S.J.H., Research synthesis in sport and exercise psychology: Chaos in the brickyard revisited, European Journal of Sport Science, June 2006; 6(2): 97-102.	2006	Review
Biddulph MJ., The limitations of the urban village concept in neighbourhood renewal: a Merseyside case study. Urban Design International (2003) Urban Design International 8 (1/2) , pp. 5-19. 10.1057/palgrave.udi.9000090	2003							1
Bisset S, Daniel M, Potvin L., Exploring the Intervention Context Interface : A Case From a School-Based Nutrition Intervention. American Journal of Evaluation 2009 30: 554-571. http://aje.sagepub.com/content/30/4/554	2009	Evaluation
Bisset S., Potvin L. Expanding our conceptualization of program implementation: lessons from the genealogy of a school-based nutrition program, Health Education Research, Vol.22 no.5 2007, 737–746. http://her.oxfordjournals.org/content/22/5/737.full.pdf	2007	Theory Article
Blackman T, David Hunter, Linda Marks, Barbara Harrington, Eva Elliott, Gareth Williams, Alex Greene, and Lorna Mckee Wicked Comparisons: Reflections on Cross-national Research about Health Inequalities in the UK .Evaluation, January 2010; vol. 16, 1: pp. 43-57.	2010							1
Blackman T, Jen Harvey, A Lawrence, Simon A, Neighbourhood renewal and health : evidence from a local case study. Health place (2001)	2001	Evaluation
Boarnet MG, Anderson CL, Day K, McMillan T, Alfonzo M. Evaluation of the California Safe Routes to School legislation: urban form changes and children’s active transportation to school. Am J Prev Med. 2005;28(2 suppl 2):134–140	2005	Evaluation		WC	x
Boehmer TK, Brownson RC, Haire-Joshu D, Dreisinger ML. Patterns of childhood obesity prevention legislation in the United States. Prev Chronic Dis [serial online] 2007 Jul [date cited]. Available from: http://www.cdc.gov/pcd/issues/2007/jul/06_0082.htm.	2007							1
Bonell C, Harden A, Wells H, Jamal F,Fletcher A, Petticrew M, ,Protocol for a systematic review of the effects of schools and school-environment interventions on health: evidence mapping and syntheses. BMC Public Health 2011, 11:453 doi:10.1186/1471-2458-11-453. http://www.biomedcentral.com/1471-2458/11/453.	2011	Systematic Review				1
Booth SL, Sallis JF, Ritenbaugh C, et al. Environmental and societal factors affect food choice and physical activity: rationale, influences, and leverage points. Nutr Rev. 2001;59:S21–S39discussion S57–65.	2001	Other				1
Bors P, Dessauer M, Bell R, Wilkerson R, Lee J, Strunk SL: The Active Living by Design National Program: Community initiatives and lessons learned. Am J Prev Med 2009, 37(6S2):S313-S321.	2009							1
Bovaird, T. (2006). Developing New Forms of Partnership With the ‘Market’ in the Procurement of Public Services. Public Administration, 84(1), 81-102. doi:10.1111/j.0033-3298.2006.00494.x	2010							1
Branca F, Nikogosian H, Lobstein T ,The challenge of obesity in the WHO European Region and the strategies for response, World Health Organization Regional Office for Europe 2007, ISBN 978 92 890 1409 0 (ebook)	2007	Systematic Review
Bredahl T VG, Lis Puggaard and Kirsten K Roessler, Exercise on Prescription. Effect of attendance on participants' psychological factors in a Danish version of Exercise on Prescription: A Study Protocol. BMC Health Services Research 2008, 8:139. http://www.biomedcentral.com/1472-6963/8/139	2006	Evaluation
Breton E, De Leeuw E, Theories of the policy process in health promotion research: a review. HEALTH PROMOT INT (2011) 26(1): 82-90	2011	Review
Brian W. Martin, Sonja Kahlmeier, Francesca Racioppi, Finn Berggren, Mari Miettinen, Jean-Michel Oppert, Harry Rutter, Radim Šlachta, Mireille van Poppel and Jozica Maucec Zakotnik, et al. Evidence-based physical activity promotion - HEPA Europe, the European Network for the Promotion of Health-Enhancing Physical Activity, J Public Health (2006), 14:53-57.	2006	Evaluation
Bridge Consortium (2005) The evaluation of the big lottery fund healthy living centres. London: Big Lottery Fund.	2005	Evaluation
Bringolf-Isler, B., Grize1, L., Mäder, U., Ruch, N., Sennhauser, F., Braun-Fahrländer, C., SCARPOL team, 2008. Personal and environmental factors associated with active commuting to school in Switzerland. Prev Med. 46,67–73.	2008	Other				1
Brink LA, Nigg CR, Lampe SM, Kingston BA, Mootz AL, van Vliet W. Influence of schoolyard renovations on children’s physical activity: the Learning Landscapes Program. Am J Pub Health. 2010; 100(9): 1672–78.	2010	Evaluation
Brown C, (2005) "Mapping system capacity in the WHO/EURO Region: A WHO/EURO partnership initiative to explore and debate the capacity of national systems to address the social and economic determinants of healtrT.WHO Euro Office for Investment for Health and Development.	2005							1
Brown DR, Heath GW, Martin, SL (Eds.). Promoting Physical Activity: A Guide to Community Action, 2nd ed. Champaign, IL: Human Kinetics, 2010	2010	Guidance
Brown HE, Atkin A J, Panter J, Corder K, Wong G, Chinapaw M J M, et al: Family-based interventions to increase physical activity in children: a meta-analysis and realist synthesis protocol. BMJ Open 2014, 4(8): e005439. doi: 10.1136/bmjopen-2014-005439.	2014	Realist review
Brown LD, Khagram S,Moore MH, Frumkin P, Globalization, NGOs and Multi-Sectoral Relations The Hauser Center for Nonprofit Organizations and The Kennedy School of Government Harvard University,July 2000 Working Paper No. 1 http://195.130.87.21:8080/dspace/bitstream/123456789/120/1/Globalization%20NGO's%20and%20multi%20sectoral%20relations%20Brown.pdf	2000	Theory Article
Brown WJ, Mummery K, Eakin E et al. 10,000 Steps Rockhampton: Evaluation of a Whole Community Approach to Improving Population Levels of Physical Activity. J Phys Act Health 2006;3:1-14. RECUP	2006	Evaluation
Brownson RC, Jamie F. Chriqui, PhD, and Katherine A. Stamatakis, Understanding Evidence-Based Public Health Policy. Am J Public Health. 2009 September; 99(9): 1576–1583.doi: 10.2105/AJPH.2008.156224 PMCID: PMC2724448	2004							1
Brownson RC, Ballew P, Brown, KL,Elliott MB, Haire-Joshu D, Heath GW, Kreuter MW: The Effect of Disseminating Evidence-Based Interventions That Promote Physical Activity to Health Departments. Am J Public Health 2007, 97:1900–1907. doi: 10.2105/AJPH.2006.090399	2007	Evaluation
Brownson RC, Royer C, Ewing R, McBride TD. Researchers and policymakers: travelers in parallel universes. Am J Prev Med. 2006;30(2):164–172. TROVA	2006							1
Brownson, R.C., Haire-Joshu, D., Luke, D.A., 2006. Shaping the context of health: a review of environmental and policy approaches in the prevention of chronic diseases. Annu. Rev. Public Health 27, 341–370.	2006	Review				1
Brug J., Oenema A., Ferreira I., Theory, evidence and Intervention Mapping to improve behavior nutrition and physical activity interventions, International Journal of Behavioral Nutrition and Physical Activity 2005, 2:2 http://www.ijbnpa.org/content/2/1/2	2005	Theory Article
Brunton G, Harden A, Rees R, Kavanagh J, Oliver S, Oakley A (2003) Children and physical activity: a systematic review of barriers and facilitators. London: EPPI-Centre, Social Science Research Unit, Institute of Education, University of London. http://eppi.ioe.ac.uk/cms/LinkClick.aspx?fileticket=pPtDU1S8W1c%3d&tabid=245&mid=1081	2003	Systematic Review			x
Brunton G, Oliver S, Oliver K, Lorenc T (2006) A Synthesis of Research Addressing Children's, Young People’s and Parents’ Views of Walking and Cycling for Transport. London: EPPI-Centre, Social Science Research Unit, Institute of Education, University of London. http://eppi.ioe.ac.uk/cms/LinkClick.aspx?fileticket=W4j_bi08vDQ%3d&tabid=942&mid=2141	2006	Systematic Review		WC
Brunton G, Thomas J, Harden A, Rees R, Kavanagh J, Oliver S, Shepherd J, Oakley A (2005) Promoting physical activity amongst children outside of physical education classes: a systematic review integrating intervention studies and qualitative studies. Health Education Journal 64: 323-338.	2005	Systematic Review
Buchan DS, Ollis S, Thomas NE and Baker JS: Physical Activity Behaviour: An Overview of Current and Emergent Theoretical Practices, J Obes 2012, 2012:546459. doi:10.1155/2012/546459.	2012	Theory Article
Buehler R, Arne Jungjohann, Melissa Keeley, Michael Mehling , How Germany Became Europe’s Green Leader: A Look at Four Decades of Sustainable Policymaking Solutions,Volume 2 | Issue 5 | Oct 2011. http://www.thesolutionsjournal.com/node/981	2011							1
Bull F., Adams E, Hooper P., Final Evaluation Report of Well@Work: Promoting Active and Healthy Workplaces .01/07/2008 BHF National Centre / BHF. http://www.bhfactive.org.uk/research-and-evaluation-resources-and-publications-item/102/index.html	2008	Evaluation
Bull F., Milton K, Boehler C, Evaluation of the Physical Activity Care Pathway London Feasibility Pilot –Final Technical report, 2009 BHF National Centre https://www.gov.uk/government/uploads/system/uploads/attachment_data/file/192041/Evaluation_of_the_Physical_Activity_Care_Pathway_London_Feasibility_Pilot_-_Report.pdf	2009	Evaluation
Bull FC, Armstrong TP, Dixon T, Ham S, Neiman A, Pratt M. Physical Inactivity. In: Ezzati M, Lopez A, Rodgers A, Murray C, editors. Comparative Quantification of Health Risks: Global and Regional Burden of Disease Attributable to Selected Major Risk Factors. Geneva: World Health Organization; 2005.	2005	Evaluation
Bull FC, B. Bellew, S Schöppe, A.E. Bauman Developments in National Physical Activity Policy: an international review and recommendations towards better practice, Journal of Science and Medicine in Sport, Volume 7, Issue 1, Supplement 1, April 2004, Pages 93-104.**	2004	Systematic Review
Bull, FC. and the Expert Working Groups. Physical Activity Guidelines in the U.K.: Review and Recommendations. School of Sport, Exercise and Health Sciences, Loughborough University, May 2010. http://www.dh.gov.uk/prod_consum_dh/groups/dh_digitalassets/documents/digitalasset/dh_128255.pdf	2010	Guidance
Burke, L.E., Fair, J., 2003. Promoting prevention: skill sets and attributes of health care providers who deliver behavioral interventions. J. Cardiovasc. Nurs. 18, 256–266.	2003							1
BurkeNM,ChomitzVR,RiolesNA,WinslowSP,BrukilacchioLB,BakerJC. The path to active living: physical activity through community design in Somerville,Massachusetts. Am J Prev Med 2009;37(6S2):S386–S394.	2009	Evaluation
Burton NW, Walsh, A, Brown WJ, It just doesn't speak to me: mid-aged men's reactions to '10,000 Steps a Day'. Health Promotion Journal of Australia19. 1(Apr 2008): 52-9.	2008	Evaluation
Cairns B, Harris M, Local cross-sector partnerships. Nonprofit Management & Leadership; Spring2011, Vol. 21 Issue 3, p311-324, 14p, 1 Chart	2011							1
Cameron C,Ghosh S, Eaton SL, Facilitating communities in designing and using their own community health impact assessment tool, Environmental Impact Assessment Review, 2011; 31(4): 433–437.	2011	Method				1
Canada’s physical activity guide for children, 2002 (http://www.phac-aspc.gc.ca/hp-ps/hl-mvs/pag-gap/cy-ej/index-eng.php, accessed 24 April 2010)	2002	Guidance
Canada’s physical activity guide for youth. Ottawa, Public Health Agency of Canada, 2003 (http:// www.phac-aspc.gc.ca/pau-uap/paguide/child_youth/index.html).	2003	Guidance
Canadian Society for Exercise Physiology, Canadian Physical Activity and Sedentary Behaviour Guidelines Handbook, 2012. http://www.csep.ca/CMFiles/Guidelines/CSEP_Guidelines_Handbook.pdf [last accessed 16 May 2016]	2012	Guidance
Carlson SA, Guide R, Schmid TL, Moore LV, Barradas DT, Fulton JE. Public support for street-scale urban design practices and policies to increase physical activity. J Phys Act Health. 2011;8(Suppl 1):S125–S134.http://journals.humankinetics.com/jpah-pdf-articles?DocumentScreen=Detail&ccs=6412&cl=21374	2011	Evaluation		WC
Casey M, Payne W, Eime R. Partnership and capacity-building strategies in community sports and recreation programs. Managing Leisure [serial online]. July 2009;14(3):167-176. Available from: Business Source Premier, Ipswich, MA. Accessed May 24, 2012.	2005	Other
Casey, M. M.; Payne, W. R.; Eime, R. M. Building the health promotion capacity of sport and recreation organisations: a case study of Regional Sport Assemblies.Managing Leisure; 2009 Vol. 14 Issue 2, p112-124, 13p.	2009	Guidance
Casper JM, Bocarro JN, Kanters MA, Floyd MF. “Just let me play!”—understanding constraints that limit adolescent sport participation. J Phys Act Health. 2011;8(Suppl 1):S32–S39. (TROVARE)	2011	Evaluation
Cavill N, Buxton K, Bull F, Foster C, Promotion of physical activity among adults Evidence into practice briefing, National Institute for Health and Clinical Excellence (NICE) March 2006	2006	Evaluation
Cavill N, Kahlmeier S and Racioppi F: Physical activity and health in Europe: evidence for Action., Copenhagen, Denmark: World Health Organisation Regional Office for Europe; 2006. http://www.euro.who.int/__data/assets/pdf_file/0011/87545/E89490.pdf [last accessed 28 May 2016]	2006	Guidance
Cavill N, Kahlmeier S, Harry R, Racioppi F, Pekka O, Economic analyses of transport infrastructure and policies including health effects related to cycling and walking: A systematic review’’. Transport Policy 15(5) (2008) 291–304]. Cav. Transport Policy vol. 16 issue 1 January, 2009. p. 46	2009	Systematic Review		WC
Cavill N, Kahlmeier S, Racioppi F., Attività fisica e salute in Europa. Conoscere per agire, 2007, Armando.	2007	Guidance
Cavill N, Racioppi F, Kahlmeier S, Physical Activity and Health in Europe. Evidence for Action. Copenhagen: WHO Ragional Office for Europe; 2006.	2006	Evaluation
Cavill PN, Foster C., An analysis of national approaches to promoting physical activity and sport in children and adolescent. Full report for HEPA Europe November, 2009. http://www.euro.who.int/__data/assets/pdf_file/0009/119295/HEPA_children_analysis_report.pdf	2009	Evaluation
CDC. Increasing physical activity. A report on recommendations of the Task Force on Community Preventive Services. MMWR 2001;50 (RR-18):1-16.	2001	Guidance
Center for Disease Control and Prevention. The Guide to Community Preventive Services: Enhanced Physical Education Classes in Schools are Recommended to Increase Physical Activity Among Young People. 2005. Available at: http://www.thecommunityguide.org/pa/behavioral-social/schoolbased-pe.html , Accessed Jun 10 2011.26.	2005	Guidance
Centers for Disease Control and Prevention (CDC): School health guidelines to promote healthy eating and physical activity. MMWR, Atlanta, GA: US Department of Health and Human Services 2011, 60(5), 1-76. http://www.cdc.gov/mmwr/pdf/rr/rr6005.pdf [last accessed 16 May 2016]	2011	Guidance
Centers for Disease Control and Prevention: The association between school-based physical activity, including physical education, and academic performance. Atlanta, GA: US. Department of Health and Humans Services; 2010. http://www.cdc.gov/healthyschools/health_and_academics/pdf/pa-pe_paper.pdf [last accessed 16 May 2016]	2010	Evaluation
Change4Life Marketing Strategy, DH Publications London, 2009 http://www.nhs.uk/Change4Life/supporter-resources/downloads/Change4Life_Marketing%20Strategy_April09.pdf	2009	Other
Chaskin, R.J. Building community capacity: A definitional framework and case studies from a comprehensive community initiative (2000) Urban Affairs Review, 36 (3), pp. 291-323. Cited 89 times.doi: 10.1177/10780870122184876	2000	Theory Article
Cheadle A, Egger R, James P. LoGerfo, Walwick J, Schwartz S. A Community-Organizing Approach to Promoting Physical Activity in Older Adults: The Southeast Senior Physical Activity Network. Health Promot Pract, March 2010; vol. 11, 2: pp. 197-204.	2010	Other
Cheever M, Parks Are the Answer: Help Us Prove It. Journal of Physical Activity and Health, 2011, 8(Suppl 1), S143-S144. http://journals.humankinetics.com/jpah-pdf-articles?DocumentScreen=Detail&ccs=6412&cl=21377	2011	Other			x	1
Chomitz V R, Denise Burke Aske, McDonald J, Cabral H, Hacker K A, The Role of Recreational Spaces in Meeting Physical Activity Recommendations Among Middle School Students, Journal of Physical Activity and Health 2011, 8(Suppl 1), S8-S16. http://journals.humankinetics.com/jpah-pdf-articles?DocumentScreen=Detail&ccs=6412&cl=21359	2011	Evaluation
Chomitz V, McDonald J, Burke-Aske D, Cabral H, Hacker K,Physical Activity Among Middle School Students in Somerville: Trends over time and in relation to a comparison community.Active Living by Design Conference, 2010 http://216.92.169.205/files/2010_PolicyChange_Chomitz.pdf	2010	Other
Christensen T.; Lagreid P.; Roness P. G.; Rovik K. A.;Organization Theory and the Public Sector; 2007 : Routledge. Document Type: book; (AN OTPS.CHRISTENSEN.ROUTLEDGE.BJJG) [Citation Record]Database: EBSCO Publishing Citations	2012	Theory Article
Clauser, S.B. , Taplin, S.H. , Foster, M.K. Multilevel intervention research: Lessons learned and pathways forward (2012) Journal of the National Cancer Institute - Monographs	2012	Evaluation
Coaffee J, Deas L, Community-led Regeneration Partnerships The Search for Policy Innovation in Urban Governance: Lessons from Public Policy and Administration 2008; 23; 167	2008	Evaluation
Coaffee, J. (2012) Policy transfer, legacy and major sporting events: lessons for London 2012 and beyond, International Journal of Sports Policy and Politics	2012	Evaluation
Cohen D, Sehgal A, Williamson S, Sturm R, McKenzie TL, Lara R, Lurie N, Park Use and Physical Activity in a Sample of Public Parks in the City of Los Angeles, RAND Corporation Technical Report 2006, Santa Monica, CA. www.rand.org	2006	Evaluation		WC park		1
Cohen DA, McKenzie TL, Sehgal A, Williamson S, et al. Contribution of Public Parks to Physical Activity. American Journal of Public Health; Mar 2007; 97, 3 https://www.researchgate.net/profile/Thomas_Mckenzie2/publication/6536391_Contribution_of_public_parks_to_physical_activity/links/0912f5101a45af27fe000000.pdf	2007	Other				1
Cohen SJ, Meister JS, deZapien JG ,Special action groups for policy change and infrastructure support to foster healthier communities on the Arizona-Mexico border,Public Health Rep, 2004 ; 119:40-7.	2004							1
Cohen, D. A., McKenzie, T.L., Sehgal, A., Lurie, N., Golinelli, D., & Williamson, S. How do public parks contribute to physical activity? American Journal of Public Health. 2007 March; 97(3): 509–514. doi: 10.2105/AJPH.2005.072447	2007	Evaluation				1
Cohena DA ,Marsha T, Williamsona S, Golinellia D, McKenzie TL, bImpact and cost-effectiveness of family Fitness Zones: A natural experiment in urban public parks.Volume 18, Issue 1, January 2012, Pages 39–45.http://www.sciencedirect.com/science/article/pii/S1353829211001821	2012	Evaluation			x	1
Colman R, Application of the Genuine progress index to Nova Scotia. THE COST OF PHYSICAL INACTIVITY IN NOVA SCOTIA, GPIAtlantic. Report for Recreation Nova Scotia and Sport Nova Scotia. May, 2002. http://www.gpiatlantic.org/pdf/health/inactivity.pdf	2002	Evaluation
Commissione Europea, Verso una strategia tematica dell'ambiente Urbano, COM(2004)60 def 11.02.2004 Bruxelles http://ec.europa.eu/environment/pubs/pdf/streets_people.pdf	2004	Other				1
Commonwealth of Australia Australia's physical activity recommendations for 5–12 year olds http://www.health.gov.au/internet/wcms/publishing.nsf/Content/phd-physical-activity-kids-pdf-cnt.htm/$FILE/kids_phys.pdf	2014	Guidance
Commonwealth of Australia Healthy Weight 2008: Australia's Future. The National Action Action Agenda for Children and Young People and their Families. 2003.	2003	Other
Commonwealth of Australia Healthy Weight for Adults and Older Australians: A national action agenda to address overweight and obesity in adults and older Australians 2006–2010 http://www.healthyactive.gov.au/internet/healthyactive/publishing.nsf/Content/healthy_weight06_10.pdf/$File/healthy_weight06_10.pdf	2006	Plan
Connel JP., Kubish AC, Applying a Theory of Change Approach to the Evaluation of Comprehensive Community Initiatives: Progress, Prospects, and Problems, The Aspen Institute USA, . 1998. http://communities.usaidallnet.gov/fa/system/files/Applying+Theory+of+Change+Approach.pdf	1998	Method
Connelly J.B., Duaso MJ, Butler G, A systematic review of controlled trials of interventions to prevent childhood obesity and overweight: A realistic synthesis of the evidence, Public Health, Volume 121, Issue 7 , Pages 510-517, July 2007	2007	Systematic Review
Coote A, Allen J, Woodhead D (2004) Finding out what works – building knowledge about complex, community-based initiatives. London: King’s Fund. King’s Fund London UK. http://www.kingsfund.org.uk/sites/files/kf/field/field_publication_file/finding-out-what-works-community-based-inititatives-nov04.pdfhttp://www.kingsfund.org.uk/sites/files/kf/field/field_publication_file/finding-out-what-works-com…	2004	Evaluation					1
Cope A, Cairns S, Fox K, Lawlor, Lockie, Lumsdon, Riddoch & Rosen: The UK National Cycle Network: an assessment of the benefits of a sustainable transport infrastructure. World Transport Policy & Practice, Volume 9, Number 1, (2003) 6–17. http://citeseerx.ist.psu.edu/viewdoc/download?doi=10.1.1.199.8600&rep=rep1&type=pdf	2003	Method
Costanzo S. School role in health education in Italy. Int J Pediatr Obes 2011; 6(Suppl. 2): 6–7.	2011				x			1
Council of the European Union, 2010. Council conclusions on the launching of joint programming initiatives on 'Agriculture, food security and climate change', Cultural Heritage and Global Change: a new challenge for Europe, and ‘A healthy diet for a healthy life’, n. 14976/10, Brussels, 14 October 2010. http://data.consilium.europa.eu/doc/document/ST-14976-2010-INIT/en/pdf [last accessed 16 May 2…	2010	Other
Cox L, Berends V, Sallis JF, St John JM, McNeil B, gonzalez M, Agron P. Engaging school governance leaders to influence physical activity policies. J Phys Act Health. 2011; 8 Suppl 1: S40–48.	2011							1
Cradock A L, O'Donnell E M, Benjamin S E, Walker, E and Slining M A: A review of state regulations to promote physical activity and safety on playgrounds in child care centers and family child care homes J Phys Activ Health 2010, 7 (Suppl 1): 108-119.	2010	Review	1
Cradock, Angie L; Troped, Philip J; Fields, Billy; Melly, Steven J; Simms, Shannon V; et Al. Factors Associated with Federal Transportation Funding for Local Pedestrian and Bicycle Programming and FacilitiesJournal of Public Health Policy, suppl. SUPPLEMENT 1: Connecting Active Living Research to Policy..30(2009): S38-72.	2009							1
Craig, P., Dieppe P, Macintyre S, Michie S.,Nazareth I, Petticrew M., Developing and evaluating complex interventions: New guidance. Publication date: 29/09/2008, Medical Research Council . www.mrc.ac.uk/complexinterventionsguidance	2008	Method
Crosby R, Noar SM., Theory development in health promotion: are we there yet? J Behav Med. 2010 Aug;33(4):259-63.	2010	Method
Currie, G., & Suhomlinova, O. (2006). The Impact of Institutional Forces Upon Knowledge Sharing in the UK NHS: The Triumph of Professional Power and the Inconsistency of Policy. Public Administration, 84(1), 1-30. doi:10.1111/j.0033-3298.2006.00491.x	2006							1
Daheia J. Barr-Anderson, Mona AuYoung, Melicia C. Whitt-Glover, Beth A. Glenn, Antronette K. Yancey et al. Integration of Short Bouts of Physical Activity Into Organizational Routine: A Systematic Review of the Literature American Journal of Preventive Medicine 2011, Vol. 40, Issue 1, Pages 76-93.	2011	Systematic Review
Dahlgren G. The need for intersectoral action for health. In: Harrington P, Ritsatakis A, eds. European Health Policy Conference: opportunities for the future, Copenhagen 5–9 December 1994. Volume II. The policy framework to meet the challenges – Intersectoral action for health. Copenhagen, WHO Regional Office for Europe, 1995 (http://whqlibdoc.who.int/euro/1994-97/ EUR_ICP_HFAP_94.01_CN01(II).pd…	1995							1
Dai D, Racial/ethnic and socioeconomic disparities in urban green space accessibility: Where to intervene? Landscape and Urban Planning Volume: 102, Issue: 4, September 30, 2011, pp. 234-244	2011							1
Dannenberg A L, Jackson, R J;Frumkin, H;Schieber, RA, Pratt M, et al. The impact of community design and land-use choices on public health: A scientific. American Journal of Public Health; Sep 2003; 93, 9; 1500-1508.	2003	Evaluation
Dannenberg AL, Bhatia R, Cole BL, Heaton SK, Feldman JD, Rutt CD. Use of health impact assessment in the U.S.: 27 case studies, 1999–2007. AmJPrevMed 2008;34(3):241–56.	2008	Evaluation
Daugbjerg SB, Kahlmeier S, Racioppi F, Martin-Diener E, Martin B, Oja P, et al: Promotion of physical activity in the European region: Content analysis of 27 national policy documents. J Phys Act Health 2009, 6(6):805-817.	2009	Evaluation	1
Davies HTO, Nutley SM. In: Smith PC editors. What works? Evidence-based policy and practice in public services. Bristol: The Policy Press; 2000.	2000							1
Davies P, Walker AE and Grimshaw JM: A systematic review of the use of theory in the design of guideline dissemination and implementation strategies and interpretation of the results of rigorous evaluations. Implement Sci 2010, 5:14. doi: 10.1186/1748-5908-5-14.	2010	Evaluation
De Leeuw E, Theory and Policy Innovation for Health: where has the creativity and fun gone? HEALTH PROMOT INT (2011) 26(1): 1-3	2011							1
Deehr RC, Shumann A. Active Seattle: achieving walkability in diverse neighborhoods. Am J Prev Med 2009;37(6S2):S403–S411.	2009				x			1
Department for Transport. Walking and Cycling: An Action Plan (TINF 93). London: Department for Transport; 2004 set out 42 actions across Government aimed at increasing levels of walking and cycling.	2004	Plan		WC
Department of Health. Local involvement networks explained. London: Department of Health. 2007	2007	Evaluation
Department of Health. Physical activity, health improvement and prevention. At least five a week. Evidence on the impact physical activity and its relationship to health. A report from the Chief Medical Officer. London, Department of Health, 2004.	2004	Systematic Review
Dill J and Howe D: The role of health and physical activity in the adoption of innovative land use policy: findings. J Phys Activ Health 2011, 8 (Suppl 1), S116-124.	2011	Evaluation	1
Ding D, Gebel K: Built environment, physical activity, and obesity: What have we learned from reviewing the literature? Health Place 2012,18:100-105. doi: 10.1016/j.healthplace.2011.08.021.	2012	Review				1
Ding, D., Sallis, J.F., Kerr, J., Lee.S., & Rosenberg, D.E. (2011). Neighborhood Environment and Physical Activity Among Youth: A Review. American Journal of Preventive Medicine, 41, 442-455.	2011	Review				1
Dixon-Woods M, Agarwal S, Jones D, Young, B, and Sutton A: Synthesising qualitative and quantitative evidence: a review of possible methods. J Health Serv Res Policy 2005, 10:45-53.	2005	Method
Dobbins M, De Corby K, Robeson P, Husson H, Tirilis D. School-based physical activity programs for promoting physical activity and fitness in children and adolescents aged 6-18. Cochrane Database Syst Rev. 2009 Jan 21;(1):CD007651.	2009	Systematic Review			x
Dobson, N. G., & Gilroy, A. R. (2009). From partnership to policy: The evolution of active living by design in Portland, Oregon. American Journal of Preventive Medicine, 37, S436–S444.	2009							1
Dowda M, Sallis JF, McKenzie TL, Rosengard P, Evaluating the sustainability of SPARK Physical Activity Education: A case study of translating research into practice, Research Quarterly for Exercise and Sport, 2005, 76(1),11-19.	2005							1
Draft EU Physical Activity Guidelines endorsed by EU Sport Ministers in November 2008 http://ec.europa.eu/sport/news/news682_en.htm	2008	Guidance
Duit A. Galaz V, Governance: An International Journal of Policy, Administration, and Institutions, Vol. 21, No. 3, July 2008 (pp.311–335).http://lowres.stockholmresilience.org/download/18.39aa239f11a8dd8de6b800026687/DuitGalaz_Governance_2008.pdf	2008							1
Dunn AL, Blair. SN, Translating Evidence-Based Physical Activity Interventions into Practice. The 2010 Challenge, Am J Prev Med, 22 (4s), pp 67-72, 2002.	2002							1
Durant N, Harris SK, Doyle S, Person S, Saelens Be, Kerr J, Norman gJ, Sallis JF. Relation of school environment and policy to adolescent physical activity. J Sch Health. 2009; 79(4): 153–159.	2009	Other				1
Economos C et al. What lessons have been learned from other attempts to guide social change? Nutrition Reviews, 2001, 59:40–56.	2001	Review
Edwards P and Tsouros T: Promoting physical activity and active living in urban environments. Copenhagen, Denmark: World Health Organization, Regional Office for Europe; 2006. http://www.euro.who.int/__data/assets/pdf_file/0009/98424/E89498.pdf [last accessed 16 May 2016]	2006	Guidance				1
Edwards P., Tsouros A, A healthy city is an active city: a physical activity planning guide, World Health Organization Europe, 2008. www.euro.who.int/document/e91883.pdf	2008	Guidance		WC		1
Edwards P., Tsouros A, The Solid Facts. Promoting physical activity and active living in urban environments. THE ROLE OF LOCAL GOVERNMENTS, World Health Organization Europe, 2006. www.euro.who.int/document/e89498.pdf	2006	Guidance				1
EEA European Environment Agency, Beyond transport policy — exploring and managing the external drivers of transport demand Illustrative case studies from Europe. EEA Luxembourg: Office for Official Publications of the European Communities, Technical report No 12/2008	2008	Review		WC		1
Egger G, Donovan R, Swinburn B, Giles-Corti B, Bull F. (1999), Physical Activity Guidelines for Australians Scientific Background Report, The University of Western Australia and The Centre for	1999	Guidance
Eime RM, Payne W, Harvey J. Making sporting clubs healthy and welcoming environments: a strategy to increase participation. Journal of Science and Medicine in Sport 2008;11(2):146-54.	2008	Theory Article
Eisenhardt, K. M. . (1989). Building Theories from Case Study Research. (A. M. Huberman & M. B. Miles, Eds.)Academy of Management Review, 14(4), 532-550. Academy of Management. Retrieved from http://www.jstor.org/stable/258557?origin=crossref	1989	Theory Article
Ekkekakis P, Parfitt G, Petruzzello SJ., The pleasure and displeasure people feel when they exercise at different intensities: decennial update and progress towards a tripartite rationale for exercise intensity prescription. Sports Med. 2011 Aug 1;41(8):641-71.	2011	Other
Elroy M, A social historical analysis of U.S. youth physical activity and sedentary behavior , Youth physical activity and sedentary behavior challanges and solutions (2008)	2008	Other
Epstein L. Integrating theoretical approaches to promote physical activity. In Blair S, Morrow J. (ed.) Theme Issue: Physical Activity Interventions. Am. J. Prev. Med. 1998; 15: 257-65.	1998	Theory Article
Epstein LH, AM Valoski, LS Vara… Reducing sedentary behaviour and increasing physical activity among 10-year-old children: overview and process evaluation of the 'Switch-Play'intervention, Health …, 1995 - psycnet.apa.org	1995	Evaluation
Epstein, L H; Roemmich, J N; Paluch, R A; Raynor, HA (2005) Physical activity as a substitute for sedentary behavior in youth. Annals of behavioral medicine,2005,29(3):200-209. RECUPER	2006							1
Erakovic, L., & Powell, M. (2006). Pathways of Change: Organizations in Transition. Public Administration, 84(1), 31-58. doi:10.1111/j.0033-3298.2006.00492.x	2006				x			1
Estabrooks, Paul A.; Glasgow, Russell E. Translating Effective Clinic-Based Physical Activity Interventions into Practice. Translating Effective Clinic-Based Physical Activity Interventions into Practice.Am J Prev Med 2006;31(4S):	2006	Review			x
Euopean Union, Report 2009 EU Platform for Action on Diet, Physical Activity and Health, http://ec.europa.eu/health/ph_determinants/life_style/nutrition/platform/platform_en.htm	2009	Plan
European Commission Directorate General SANCO, Implementation Progress report for the “Strategy for Europe on nutrition, overweight and obesity-related health issues 2007-2013”, European Commission 2010	2010	Other
European Commission, Developing the European dimension in sport. Brussels, European Commission, 2011 (COM(2011) 12 final).	2011	Guidance
European Commission, GREEN PAPER Promoting healthy diets and physical activity: a European dimension for the prevention of overweight, obesity and chronic diseases, Brussels, 08.12.2005 COM(2005) 637 final	2005	Guidance
European Commission, Reclaiming city streets for people. Chaos or quality of life?, 2006 http://ec.europa.eu/environment/pubs/pdf/streets_people.pdf	2006	Other
European Commission, STRATEGIC IMPLEMENTATION PLAN FOR THE EUROPEAN INNOVATION PARTNERSHIP ON ACTIVE AND HEALTHY AGEING STEERING GROUP WORKING DOCUMENT. FINAL TEXT ADOPTED BY THE STEERING GROUP ON 7/11/11 Strategic Plan (eip_strategic_Plan.pdf)	2011	Plan
European Commission, White Paper on a Strategy for Europe on Nutrition, Overweight and Obesity related health issues COM(2007) 279 final.	2007	Guidance
European Commission, White Paper on Sport COM(2007) 391 final - [http://ec.europa.eu/sport/white-paper/index_en.htm]	2007	Guidance
European Union, Eurobarometer 72.3. Special Eurobarometer 334: Sport and PA Health Behaviour in School Aged Children 2005/06 Survey	2006							1
European Union: Physical activity guidelines. Recommended policy actions in support of health-enhancing physical activity. Brussels, 10 October 2008. http://ec.europa.eu/sport/library/policy_documents/eu-physical-activity-guidelines-2008_en.pdf [last accessed 22 May 2016]	2008	Guidance
Evaluation of the Eastern and Coastal Kent PCT Exercise Referral Programme , 01/10/2008. BHF National Centre The BHFNC carried out the evaluation of the Eastern and Costal Kent Primary Care Trust Exercise Referral Programme.	2008	Evaluation
Evans, D., and A. Killoran. 2000. Tackling Health Inequalities through PartnershipWorking: Learning from a Realistic Evaluation. Critical Public Health 10(2):125–40.	2000							1
Evenson K, Scott M, Cohen D, Voorhees C. Girls’ perception of neighborhood factors on physical activity, sedentary behavior, and BMI. Obesity (Silver Spring) 2007;15(2):430-45.27.	2007	Evaluation
Evenson KR, Mcginn AP. Availability of school physical activity facilities to the public in four U.S. communities. Am J Health Promot. 2004; 18: 243–250.	2004							1
Evenson KR, Wen F, Lee SM, Heinrich K, eyler AA. National study of changes in prevalence and community access to school physical activity facilities: The School Health Policies and Programs Study. J Phys Act Health. 2010; 7: S20–S30.	2010							1
Ewing R, Dumbaugh E, The built environment and traffic safety a review of empirical evidence. Journal of Planning Literature, 2009; 23(4)347-367	2009	Review				1
Ewing R, Schmid T, Killingsworth R, Zlot A, Raudenbush S. Relationship between urban sprawl and physical activity, obesity, and morbidity. Am J Health Promot. 2003;18:47–57.	2003					1		1
Eyler A, Brownson R, Schmid T, Pratt M., Understanding Policies and Physical Activity: Frontiers of Knowledge to Improve Population Health. Journal of Physical Activity and Health. Journal of Physical Activity and Health, 2010, 7(Suppl 1), S9-S12 http://paprn.wustl.edu/pastprojects/Documents/Eyler_intro.pdf	2000	Theory Article
Eyler AA, Brownson RC, Aytur SA, Cradock A, Doescher, M, Evenson, KR et al: Examination of trends and evidence-based elements in state physical education legislation: a content analysis. J Sch Health 2010, 80(7):326-32 doi: 10.1111/j.1746-1561.2010.00509.x.	2010	Evaluation	1
Eyler AA, Brownson RC, Donatelle RJ, King AC, Brown D, Sallis JF. Physical activity social support and middle- and older-aged minority women: results from a U.S. survey. Soc Sci Med. 1999;49(6):781–789.	1999							1
Eyler AL, Bassett D, La Monte M, Wiese-Bjornstal D, Volpe S, Mechanick, Promoting Physical Activity through Policy. Research Digest. President’s Council on Fitness, Sports & Nutrition Rockville, MD Series 12, Number 3, 2011. http://fitness.gov/pdfs/research-digest-september-2011.pdf	2011	Theory Article
Fantini AC, Compagni A, Rucci P, Mimmi S, Longo F: General practitioners’ adherence to evidence-based guidelines: A multilevel analysis. Health Care Management Rev 2012, 37, 67-76. doi: 10.1097/HMR.0b013e31822241cf.	2012	Evaluation	1
FarrelC, Patient and Public Involvement: The Evidence for Policy Implementation, NHS Department of Health, London. 2004 http://www.dh.gov.uk/en/Publicationsandstatistics/Publications/PublicationsPolicyAndGuidance/DH_4082332	2006	Evaluation
Faskunger JT. Active living in healthy cities. Journal of Urban Health.2013 Oct; 90(Suppl 1): 142–153.	2013							1
Fawcett S, Schultz J, Watson-Thompson J, Fox M, Bremby R. Building multisectoral partnerships for population health and health equity. Prev Chronic Dis. 2010 Nov;7(6):A118. Epub 2010 Oct 15.	2010	Systematic Review
Fawcett S, Schultz J,Watson-Thompson J, Fox M, Bremby R. Building multisectorial partnerships for population health and health equity. Prev Chronic Dis 2010;7(6). http://www.cdc.gov/pcd/issues/2010/nov/10_0079.htm. Accessed [25 Jan 2012].	2000							1
Fenton M, Community Design and Policies for Free-Range Children: Creating Environments That Support Routine Physical Activity. Childhood Obesity. February 2012, 8(1): 44-51. doi:10.1089/chi.2011.0122.	2012	Theory Article				1
Ferlie E, Fitzgerald L, McGivern G, Dopson S and Bennet C., PUBLIC POLICY NETWORKS AND ‘WICKED PROBLEMS’: a nascent solution? Public Administration. Volume 89, Issue 2, June 2011, Pages: 307–324, DOI: 10.1111/j.1467-9299.2010.01896.x	2011							1
Fervers B, Burgers JS, Haugh MC, Latreille J, Mlika-Cabanne N, Paquet L, Coulombe M, Poirier M, Burnand B.Adaptation of clinical guidelines: literature review and proposition for a framework and procedure.Int J Qual Health Care. 2006 Jun;18(3):167-76.	2006	Review			x
Fielden, S. J., Rusch, M. L., Masinda, M., Sands, J., Frankish, J., & Evoy, B. (2007). Key considerations for logic model development in research partnerships: A Canadian case study. Evaluation & Program Planning, 30(2), 115-124. doi:10.1016/j.evalprogplan.2007.01.002	2005	Theory Article
Final REPORT 2000-2001EUROPEAN NETWORK FOR THE PROMOTION OF HEALTH-ENHANCING PHYSICAL ACTIVITY, Tampere, Finland, 15 August 2001 (Ilkka Vuori, European Network for the Promotion of Health-enhancing Physical Activity)	2001	Guidance
Flaman LM, Ronald C. Plotnikoff, Candace I. J. Nykiforuk, and Kim Raine, Mechanisms for Understanding the Facilitators and Barriers to Capacity Building for Chronic Disease Prevention Activities: An Illustration. Health Promot Pract November 2011 12: 858-866,	2011							1
Fogelholm M, Suni J, Rinne M, Oja P, Vuori I: Physical Activity Pie: A Graphical Presentation Integrating Recommendations for Fitness and Health. J Phys Act Health 2005, 2:391-396.	2005							1
Fosse, E, Mittelmark, M, Skogli, K (2005) "European capacity for health promotion at the national level'.Report from HP-Source.net.	2005	Evaluation
Fosse, E.; Helgesen, M. Advocating for Health Promotion Policy in Norway: The Role of the County Municipalities. Societies, 2017, 7, 5. DOI:10.3390/soc7020005	2017	Evaluation
Foster C: Developing and transferring evidence into practice: NICE or nasty? Reflections on working with NICE to develop and implement public health guidance. Dalhousie University and Atlantic Health Promotion Research Centre 2010, 38-45. http://www.ndph.ox.ac.uk/bhfcpnp/publications/400685 [last accessed 11 April 2016]	2010	Guidance	1
Foster C: Guidelines for health-enhancing physical activity promotion programmes. The European network for the promotion of health-enhancing physical activity. Tampere: UKK Institute; 2000. www.panh.ch/hepaeurope/materials/Guidelines%20HEPA%20Europe.pdf	2000	Guidance
Foster Charles, Hillsdon Melvyn, Thorogood Margaret. Interventions for promoting physical activity. Cochrane Database of Systematic Reviews: Reviews 2005 Issue 1 John Wiley & Sons, Ltd Chichester, UK DOI: 10.1002/14651858.CD003180.pub2	2005	Systematic Review
Foster S, Giles-Corti B.The built environment, neighborhood crime and constrained physical activity: an exploration of inconsistent findings.. Prev Med. 2008 Sep;47(3):241-51. Epub 2008 Apr 9.	2008	Systematic Review			x	1
Fox KR, Hillsdon M, Physical activity and obesity. Obesity Review, 2007, 8 (Suppl. 1), 115–121.	2007							1
Frank LD, Andresen MA, Schmid TL. Obesity relationships with community design, physical activity, and time spent in cars. Am J Prev Med. 2004;27:87–96 Full-Text PDF (375 KB)	2004	Evaluation
Frank LD, Engelke P. How land use and transportation systems impact public health: a literature review of the relationship between physical activity and built form. Atlanta, Centers for Disease Control and Prevention, 2000 (ACES: Active Community Environments Initiative Working Paper No. 1; http://www.cdc.gov/nccdphp/dnpa/pdf/aces-workingpaper1.pdf, accessed .	2000	Review			x	1
Fraser SN, Spink KS. Examining the role of social support and group cohesion in exercise compliance. J Behav Med. 2002;25(3):233–249.	2002	Evaluation
French B, Thomas LH, Baker P, Burton C R, Pennington L, Roddam H, What can management theories offer evidence-based practice? A comparative analysis of measurement tools for organisational context. Implementation Science 2009, 4:28 http://www.implementationscience.com/content/4/1/28	2009	Method			x
Fullilove M, Lee C, Sasllis J, Engaging Communities to create Active Living Environments. J Phys Act Health.2011;8(Suppl 1):S1-S4.	2011	Other				1
Gabbay J, le May A: Evidence based guidelines or collectively constructed “mindlines?” Ethnographic study of knowledge management in primary care. BMJ 2004, 329:1013.	2004	Other					1
Gagliardi AR, France Légaré, Melissa C Brouwers, Fiona Webster, David Wiljer, Elizabeth Badley, Sharon Straus, Protocol: developing a conceptual framework of patient mediated knowledge translation, systematic review using a realist approach. Implement Sci. 2011; 6: 25. Published online 2011 March 22. doi: 10.1186/1748-5908-6-25.	2011	Systematic Review					1
Gamez R, Parra D, Pratt M et al. Muevete Bogota: promoting physical activity with a network of partner companies. Promot Educ 2006;13:138-143. RECUP	2006	Evaluation
Ganann, R., Ciliska, D., Thomas, H. (2010). Expediting systematic reviews: Methods and implications of rapid reviews. Implementation Science 2010, 5:56doi:10.1186/1748-5908-5-56	2010	Method
Gantner, L.A. , Olson, C.M., Evaluation of public health professionals' capacity to implement environmental changes supportive of healthy weight. Evaluation and Program Planning. 2012, 35(3):407-416.	2012	Evaluation			x	1
GAPA Investimenti che funzionano per promuovere l’attività fisica.Febbraio 2011 http://www.globalpa.org.uk/pdf/investments-work-italian.pdf	2011	Evaluation
Garrard J, Geoffrey R, Sing Kai L, Promoting transportation cycling for women: The role of bicycle infrastructure. Preventive Medicine, 2008 Vol: 46 Issue: 1, 55-59.	2008							1
Geissela B,Participatory Governance: Hope or Danger for Democracy? A Case Study of Local Agenda 2. Local Government Studies,2009 Volume 35, Issue 4, 401-414 Volume 35, Issue 4, 2009	2009							1
Geraghty AB, Seifert W, Preston T, Holm CV, Duarte TH, Farrar SM.Partnership moves community toward Complete Streets. Am J Prev Med2009;37(6S2):S420 –S427. .	2009							1
Giles-Corti B, Kelty SF, Zubrick SR, Villanueva KP.Encouraging walking for transport and physical activity in children and adolescents: how important is the built environment? Sports Med. 2009;39(12):995-1009. doi: 10.2165/11319620-000000000-00000. (RECUPE	2009	Systematic Review		WC		1
Giles-Corti B, Knuiman M, Timperio A, Van Niel K, Pikora TJ, Bull FC, Shilton T, Bulsara M.Evaluation of the implementation of a state government community design policy aimed at increasing local walking: design issues and baseline results from RESIDE, Perth Western Australia. Prev Med. 2008 Jan;46(1):46-54. Epub 2007 Aug 11.	2008	Evaluation				1
Giles-Corti, B., Timperio, A., Bull, F., Pikora, T., 2005. Understanding physical activity environmental correlates: increased specificity for ecological models. Exerc. Sport Sci. Rev. 33, 175–181.	2005	Theory Article				1
Glanz K, Bishop DB., The role of behavioral science theory in development and implementation of public health interventions. Annu Rev Public Health. 2010 Apr 21;31:399-418.	2010	Systematic Review
Glanz K, Rimer B, Su S, Theory at a Glance U.S. Department of Health and Human Services National Institutes of Health A Guide For Health Promotion Practice, Second Ed. 2005.http://www.cancer.gov/cancertopics/cancerlibrary/theory.pdf	2005	Guidance
Glasgow RE, Emmons KM: How Can We Increase Translation of Research into Practice? Types of Evidence Needed. Annu Rev Public Health 2007, 28:413-433. doi: 10.1146/annurev.publhealth.28.021406.144145.	2007	Theory Article
Global Advocacy Council for Physical Activity, International Society for Physical Activity and Health. The Toronto Charter for Physical Activity: A Global Call to Action. May 20 2010.www.globalpa.org.uk	2010	Guidance
Global Advocacy for Physical Activity, Global Advocacy for Physical Activity (GAPA) the Advocacy Council of the International Society for Physical Activity and Health (ISPAH). NCD Prevention: Investments that Work for Physical Activity. February 2011. Disponibile in: www.globalpa.org.uk/investmentsthatwork PREVENZIONE DELLE MALATTIE NON TRASMISSIBILI: Investimenti che funzionano per promuovere l’…	2011	Guidance
Godin G, Bélanger-Gravel A, Eccles M, Grimshaw J: Healthcare professionals' intentions and behaviours: A systematic review of studies based on social cognitive theories. Implement Sci 2008, 3:36. doi: 10.1186/1748-5908-3-36.	2008	Systematic review	1
Goldsmith, S.; Eggers, W. D.;Governing by network: The new shape of the public sector; 2004, Washington, DC : Brookings Institution Press. Document Type: book; (AN GNNSPS.GOLDSMITH.BROOKINGSINSTITUTIONPRESS.BJJD) [Citation Record]	2007	Theory Article
Goldstein, H. Translating Research into Public Policy Journal of Public Health Policy, suppl. SUPPLEMENT 1: Connecting Active Living Research to Policy.. 30 (2009): S16-20.	2009	Theory Article
Gomez-Feliciano L, McCreary LL, Sadowsky R, et al. Active living Logan Square: joining together to create opportunities for physical activity. Am J Prev Med 2009;37(6S2):S361–S367.	2009							1
Goodwin M, GRIX J, BRINGING STRUCTURES BACK IN: THE ‘GOVERNANCE NARRATIVE’, THE ‘DECENTRED APPROACH’ AND ‘ASYMMETRICAL NETWORK GOVERNANCE’ IN THE EDUCATION AND SPORT POLICY COMMUNITIES, 2011 (pages 537–556) | DOI: 10.1111/j.1467-9299.2011.01921.x	2011							1
Gordon-Larsen P, McMurray Rg, Popkin BM. Determinants of adolescent physical activity and inactivity patterns. Pediatrics. 2000; 105: e83.	2000							1
Gordon-Larsen, P., Nelson, M., Page, P., and Popkin, B., 2006, Inequality in the built environment underlies key health disparities in physical activity and obesity. Pediatrics, Vol. 117, 417–424.	2006					1		1
Grant BC, SHOULD PHYSICAL ACTIVITY BE ON THE HEALTHY AGEING AGENDA? Social Policy Journal of New Zealand, 2008, 33, 163-177.	2008	Theory Article
Grant M, Caroline Bird and Penny Marno, Working paper Health inequalities and determinants in the physical urban environment: Evidence briefing. WHO Collaborating Centre for Healthy Urban Environments University of the West of England, Bristol March 2012 http://www.healthycities.org.uk/uploads/files/health_equity_and_urban_environments_briefing_22mar12.pdf	2012	Other				1
Grant, B.C. (2008). Should physical activity be on the healthy ageing agenda? Social Policy Journal of New Zealand, 33, 163-177 http://researchcommons.waikato.ac.nz/handle/10289/982	2006							1
Grant, M., Barton, H., Coghill, N. and Bird, C Evidence Review. Spatial Determinants of Health in Urban Settings. For WHO European Centre for Environment and Health,Bonn 2009. http://www.architecturecentre.co.uk/assets/files/Evidence-briefings/Spatial%20Determinants%20of%20Health%20in%20Urban%20Settings%20Briefing%20P1%20Overview.pdf	2009	Review				1
Grazia Cunningham and Yvonne L. Michael (2004) Concepts Guiding the Study of the Impact of the Built Environment on Physical Activity for Older Adults: A Review of the Literature. American Journal of Health Promotion: July/August 2004, Vol. 18, No. 6, pp. 435-443.doi: http://dx.doi.org/10.4278/0890-1171-18.6.435 http://ajhpcontents.org/doi/abs/10.4278/0890-1171-18.6.435	2004	Theory Article				1
Greaves LJ, Bialystok LR. Health in All Policies all talk and little action? Can J Public Health. 2011 Nov-Dec;102(6):407-9.	2011							1
Green J, The role of theory in evidence-based health promotion practice, Health Educ. Res. (2000) 15 (2): 125-129. http://her.oxfordjournals.org/content/15/2/125.full	2011	Method
Green LW, Orleans CT, Ottoson JM, Cameron R, Pierce JP, Bettinghaus EP. Inferring strategies for disseminating physical activity policies, programs, and practices from the successes of tobacco control. Am J Prev Med. 2006 Oct;31(4 Suppl):S66-81.	2006							1
Greenaway J.; Salter B.; Hart S.‘How Policy Networks can Damage Democratic Health: A Case Study in the Government of Governance’; Public Administration); 2007 Vol. 85, p3-38, 36p. Document Type: article; (AN PA.HE.C.GREENAWAY.PNCDDH) [Citation Record]	1998	Theory Article
Greenhalgh T, Wieringa S: Is it time to drop the ‘knowledge translation’ metaphor? A critical literature review. J R Soc Med 2011, 104:501-509. doi: 10.1258/jrsm.2011.110285.	2011	Review					1
Greenhalgh, T., C. Humphrey, J. Hughes, F. Macfarlane, C. Butler, P. Connell, and R. Pawson. 2008. The Modernisation Initiative Independent Evaluation: Final Report. London: University College London. Available at http://www.ucl.ac.uk/openlearning/research.htm.	2008							1
Greenhalgh, T., G. Robert, P. Bate, O. Kyriakidou, and F. Macfarlane.2005. Diffusion of Innovations in Health Service Organisations: A Systematic literature review. Milbank Q. 2004;82(4):581-629.	2004	Systematic review
Grimshaw J, Eccles M, Thomas R, MacLennan G, Ramsay C, Fraser C et al: Toward evidence-based quality improvement evidence (and its limitations) of the effectiveness of guideline dissemination and implementation strategies 1966–1998. J Gen Intern Med 2006, 21:(Suppl 2), S14-S20. doi: 10.1111/j.1525-1497.2006.00357.x	2006	Review
Grix J, Phillpots L, Revisiting the ' Governance Narrative'. 'Asymmetrical Network Governance' and the Deviant Case of the Sports Policy Sector, Public Policy Administration 2011, 26(1):3-20.	2012							1
Grize L, Bringolf-Isler B, Martin E, Braun-Fahrländer C, Swiss school children and its associated factors: three cross-sectional surveys 1994, 2000 and 2005. International Journal of Behavioral Nutrition and Physical Activity 2010, 7:28 . http://www.ijbnpa.org/content/7/1/28RTerseeanrchd in active transportation to school among	2010							1
Guide to Community Preventive Services. Promoting physical activity: environmental and policy approaches; 2009. www.thecommunityguide.org/pa/environmentalpolicy/index.html.	2009	Guidance				1
Haines, A., Donald, A. Getting research findings into practice. Making better use of research findings (1998) British Medical Journal, 317 (7150), pp. 72-75. Cited 118 times. View at publisher Check@Leeds 2 Oxman, A.D., Thomson, M.A., Davis, D.A., Haynes, B. No magic bullets: a systematic review of 102 trials of interventions to improve professional practice (1995) CMAJ, 153 (10), pp. 1423-1431. …	1998				x			1
Halliday J, Sheena N. M. Asthana, and Susan Richardson, Evaluating Partnership: The Role of Formal Assessment Tools. Evaluation, July 2004; vol. 10, 3: pp. 285-303.	2004				x			1
Hallsworth M, Krapels J, Ling T: The EU Platform on Diet, Physical Activity and Health. Third monitoring progress report. Santa Monica, CA: RAND Corporation; 2008. http://www.rand.org/content/dam/rand/pubs/technical_reports/2008/RAND_TR609.pdf [last accessed 16 May 2016]	2008	Evaluation	1
Hamer L, Planning with a purpose : local authorities and the NHS : planning together to improve health and well-being across the local strategic partnership, NHS Health Development Agency, 2003. http://www.nice.org.uk/niceMedia/documents/planning_with_a_purpose.pdf	2003							1
Hamer L, Smithies J, Planning across the local strategic partnership (LSP): Case studies of integrating community strategies and health improvement, NHS Health Development Agency, 2002, London. http://www.idea.gov.uk/idk/aio/400001	2002	Evaluation
Hammerback K, Felias-Christensen G, Phelan EA. Evaluation of a telephone-based physical activity promotion program for disadvantaged older adults. Prev Chronic Dis 2012;9.110071. DOI: http://dx.doi.org/10.5888/pcd9.110071 http://www.cdc.gov/pcd/issues/2012/11_0071.htm	2012							1
Harden, A (2008) Testing and building theory: mixed methods systematic reviews. In: NCRM Research Methods Festival 2008. (Unpublished) http://eprints.ncrm.ac.uk/262/1/Mixed_methods.ppt	2008	Method
Harman S, LOOKING FOR ALTERNATIVES IN GLOBAL GOVERNANCE: WHY MULTI-LEVEL HEALTH GOVERNANCE IS NOT THE ANSWER FOR POVERTY REDUCTION WORKING PAPERS ON TRANSNATIONAL POLITICS. Working Paper CUTP/007. August 2010 http://www.city.ac.uk/__data/assets/pdf_file/0003/84045/CUWPTP007.pdf	2010	Theory Article
Harman S.‘The World Bank and Health’ in A. Kay and O.D. Williams Global Health Governance: Crisis, Institutions and Political Economy. Basingstoke: Palgrave, 2009	2009							1
Hartsfield D, Moulton AD, McKie KL. A Review of Model Public Health Laws. American Journal of Public Health: April 2007, Vol. 97, No. Supplement_1, pp. S56-S61. doi: 10.2105/AJPH.2005.082057A	2007	Review
Harvey, W J;Delamere, F M;Prupas, A;Wilkinson, S., Physical Activity, Leisure, and Health for Persons with Mental Illness. Palaestra; 2010; 25, 2; pg. 36	2010							1
Haskell WL, Michaela Kiernan Methodologic issues in measuring physical activity and physical fitness when evaluating the role of dietary supplements for physically active people, American Journal of Clinical Nutrition, Vol. 72, No. 2, 541S-550s, August 2000, http://www.ajcn.org/content/72/2/541S.full.pdf+html	2000	Method
Haug E, Torsheim T, Samdal O, Local school policies increase physical activity in Norwegian secondary schools Health Promot. Int. (2010) 25(1): 63-72. doi:10.1093/heapro/dap040	2010	Evaluation
Håvelsrud K, Kristin Thuve Dahm, Live Merete Reinar og Hege Sletsjøe . Rapport fra Kunnskapssenteret nr 07 - 2011. ISBN 978-82-8121-397-5 ISSN 1890-1298 (Summary EN)	2011	Systematic Review
Health Behaviour in School-aged Children (HBSC) study: international report from the 2005/2006 survey. Copenhagen, WHO Regional Office for Europe, 2008 (Health Policy for Children and Adolescents, No. 5; http://www.euro.who.int/eprise/main/WHO/InformationSources/Publications/ Catalogue/20080617_1).	2008							1
Health Development Agency. A review of the evidence on the effectiveness of public health interventions for increasing physical activity amongst adults: a review of reviews. 2nd ed. London, Health Development Agency, 2005. )	2005	Systematic Review
Healthy by design: a planners’ guide to environments for active living. Canberra, National Heart Foundation of Australia, 2004 (http://www.goforyourlife.vic.gov.au/hav/articles.nsf/pracpages/Healthy_by_Design?OpenDocument	2004	Guidance				1
Heaney CA, Israel BA. Social networks and social support. In: Glanz K, Rimer BK, Lewis FM, eds. Health Behavior and Health Education. San Francisco, CA: Jossey-Bass; 2002:185–209.	2004							1
Hearst MO, Carrie D Patnode, John R Sirard, Kian Farbakhsh, Leslie A Lytle Multilevel predictors of adolescent physical activity: A longitudinal analysis. International Journal of Behavioral Nutrition and Physical Activity 2012, 9:8	2002							1
Heath GW, Brownson RC, Kruger J, et al. The effectiveness of urban design and land use and transport policies and practices to increase physical activity: a systematic review. J Phys Act Health. 2006;3(Suppl 1):S55–S76.	2006	Systematic Review
Hebson G, Damian Grimshaw, Mick Marchington PPPs and the changing public sector ethos: case-study evidence from the health and local authority sectors . WORK EMPLOYMENT AND SOCIETY (2003)	2003							1
Heinrich KM, Aki NN, Hansen-Smith H, Fenton M, Maddock J. A comprehensive multi-level approach for passing Safe Routes to School and Complete Streets policies in Hawaii. J Phys Act Health. 2011;8(Suppl 1):S135–S140. RECUP	2011	Evaluation		WC
Helen E. D. Burchett, Susannah H. Mayhew, John N. Lavis, and Mark J. Dobrow , When can research from one setting be useful in another? Understanding perceptions of the applicability and transferability of research. Health Promot. Int. das026 first published online July 2, 2012 doi:10.1093/heapro/das026	2012	Evaluation
Hellénius M, Sundberg CJ: Editorials: Physical activity as medicine: time to translate evidence into clinical practice. Br J Sports Med 2011, 45,158. doi:10.1136/bjsm.2011.084244.	2011	Other
Henderson A, Fry CR. Better parks through law and policy: a legal analysis of authorities governing public parks and open spaces. J Phys Act Health. 2011 Jan;8 Suppl 1:S109-15.	2011	Evaluation		WC		1
Henry, A. Douglas, and T. Dietz. (2011). Information, networks, and the complexity of trust in commons governance. Information, networks, and the complexity of trust in commons governance. International Journal of the Commons 5(2):188-212.Retrieved from http://www.thecommonsjournal.org/index.php/ijc/article/view/312/231	2011	Theory Article
Hessel, A.S.; Marshall, J.W.; Brown, W.; Sabina, A.B.; DeForest, K., Healthy & Active Communities Initiative: A foundation's response to the obesity epidemic. Preventive Medicine Volume: 50, Supplement, January, 2010, pp. S93-S94	2010							1
Higgins, E. T., Friedman, R. S., Harlow, R. E., Idson, L. C., Ayduk, O. N., & Taylor, A. (2001). Achievement orientations from subjective histories of success: Promotion pride versus prevention pride. European Journal of Social Psychology, 31, 3-23. http://www.columbia.edu/cu/psychology/higgins/research.html	2001			w				1
Hill C, Partnership for a Walkable America [web site]. Chapel Hill, Pedestrian and Bicycle Information Center, 2007 (http://www.walkableamerica.org, accessed 14 May 2007).	2007					1		1
Hill JO, Sallis JF, Peters JC, Economic analysis of eating and physical activity: A next step for research and policy change. American Journal of Preventive Medicine, 2004, 27(3 Suppl):111-116.	2004	Theory Article
Hillman CH: Conclusions and future directions of the research on physical activity and childhood cognitive and brain health. Monographs of the Society of Research on Child Development 2014, 79:149-152. doi: 10.1111/mono.12134.	2014							1
Hillsdon M, Foster C, Cavill N, Crombie H,Naidoo B. The Effectiveness of Public Health Interventions for Increasing Physical Activity among Adults: A Review of Reviews. 2nd edition. London: Health Development Agency;2005. www.hda.nhs.uk/evidence	2005	Systematic Review
Hillsdon M., Foster C., Thorogood M. Interventions for promoting physical activity. Cochrane Database Systematic Reviews 2005;(1):CD003180	2005	Evaluation
Hoehner CM, Soares J, Parra Perez D, Ribeiro IC, Joshu CE, Pratt M, Legetic BD, Carvalho Malta D, Matsudo VR, Ramos LR, Simões EJ, Brownson RC. Physical Activity Interventions in Latin America: A Systematic Review. Am J Prev Med 2008;34(3):224–233.	2008	Systematic Review
Hoeijmakers M, De Leeuw E, Keni P and De Vries N K: Local health policy development processes in the Netherlands: an expanded toolbox for health promotion. Health Promot Int 2007, 22(2):112-121.	2007	Evaluation	1
Hoffman, L.R., Cordova, S., Mercado, S., Diaz, R., Godinez, L., Torres, B., Mendoza, E., Ayala, G.X., Patrick, K., Elder, J.P.(November 2007). Lessons Learned: Developing and implementing a community based participatory Training of Trainers intervention to promote physical activity among Latinos (ppt). APHA 135th Annual Meeting and Expo. Washington D.C.	2007							1
Hood E, 2005 Dwelling Disparities: How Poor Housing Leads to Poor Health. Environ Health Perspect 113(5): doi:10.1289/ehp.113-a310	2005							1
Hosking J, Macmillan A, Connor J, Bullen C, Ameratunga S.Organisational travel plans for improving health. Cochrane Database Syst Rev. 2010 Mar 17;(3):CD005575.	2010	Systematic Review
Howie EK and Pate RR: Physical activity and academic achievement in children: A historical perspective. J Sport Health Sci 2012, 1,160-169. doi:10.1016/j.jshs.2012.09.003	2012	Evaluation	1
Huberty JL, Dodge T, Peterson K, Balluff M. Activate Omaha: the journey to an active living environment. Am J Prev Med 2009;37(6S2): S428 –S435.	2009					1		1
Huijg JM, Gebhardt WA, Verheijden MW, van der Zouwe N, De Vries J, Middlekoop BJC, Crone MR: Factors influencing primary health care professionals’ physical activity promotion behaviors: a systematic review Int J Behav Med 2014, 22:32-50 doi: 10.1007/s12529-014-9398-2.	2014	Systematic review	1
Huijg JM, van der Zouwe N, Crone MR, Verheijden MW, Middelkoop BJC, Gebhardt WA: Factors influencing the introduction of physical activity interventions in primary health care: a qualitative study Int J Behav Med 2015, 22:404-414. doi: 10.1007/s12529-014-9411-9.	2015	Evaluation
Humpel N, Owen N, Leslie E. Environmental factors associated with adults’ participation in physical activity: a review. Am J Prev Med. 2002;22:188–199 Full-Text PDF (95 KB)	2002	Review				1
International Union of Health Promotion and Education (IUHPE) (1995) "International seminar on national health promoting policies, strategies, and structures. Promotion & Education, Vol II 12,3.	1995							1
Jackson NW, Howes FS, Gupta S, Doyle JL, Waters E. Interventions implemented through sporting organisations for increasing participation in sport. Cochrane Database Syst Rev. 2008;(3):CD004812.	2008	Evaluation
Jackson R J, The impact of the built environment on health: An emerging field, American Journal of Public Health, 93: 1382-1383, 2003	2003					1		1
Jackson SF, Fran Perkins, Erika Khandor, Lauren Cordwell, Stephen Hamann, Buasai S. Integrated health promotion strategies: a contribution to tackling current and future health challenges. Health Promot. Int. (2006) 21(suppl 1): 75-83 doi:10.1093/heapro/dal054	2006	Theory Article
Jacobson PL,Racioppi F, Rutter H. Who owns the roads? How motorised traffic discourages walking and bicycling. Inj Prev. 2009 Dec;15(6):369-73.	2009	Systematic Review		WC
Jagosh J, Pierre Pluye, Ann C Macaulay, Jon Salsberg, Jim Henderson, Erin Sirett, Paula L Bush, Robbyn Seller, Geoff Wong, Greenhalgh T, Margaret Cargo, Carol P Herbert, Sarena D Seifer, Lawrence W Green LW, Assessing the outcomes of participatory research: protocol for identifying, selecting, appraising and synthesizing the literature for realist review. Implementation Science 2011, 6:24 (20 Mar…	2011	Systematic Review
Janssen I, Leblanc A. Systematic Review of the Health Benefits of Physical Activity in School-Aged Children and Youth. International Journal of Behavioural Nutrition and Physical Activity, 2009 [)].	2009	Systematic Review
Janssen I. Physical activity guidelines for children and youth. Applied Physiology Nutrition and Metabolism, 2007, 32:S109–S121.	2007	Guidance
Joassart-Marcelli P, Wolch JR, Nonprofit and Voluntary Sector Quarterly 2003 32: 70 The Intrametropolitan Geography of Poverty and the Nonprofit Sector in Southern California	2003							1
Joassart-Marcelli, P., Wolch, J., & Salim, Z. (2011). Building the Healthy City: The Role of Nonprofits in Creating Active Urban Parks. Urban Geography, 32(5), 682-711.	2011	Other				1
Jochelson H, Paying the Patient. IMPROVING HEALTH USING FINANCIAL INCENTIVES, King’s Fund LONDON 2007. www.kingsfund.org.uk	2007	Systematic Review
Joerin F, Desthieux G, Billeau Beuze S, Nembrini A, Participatory diagnosis in urban planning: proposal for a learning process based on geographical information.Journal of Environmental Management (2009) Volume: 90, Issue: 6, Publisher: Elsevier Ltd, Pages: 2002-2011.	2009				x	1		1
Johonston EW, Hicks D, Nang N, Auer Jc, Managing the Inclusion Process in Collaborative Governance. 2011 http://jpart.oxfordjournals.org/content/21/4/699.full	2011				x			1
Kahn E, Ramsey L, Brownson R, Heath G, Howze E, Powell K, Stone E, Rajab M, Corso P, the Task Force on Community Preventive Services: The effectiveness of interventions to increase physical activity: a systematic review. Am J Prev Med 2002, 22:73-107.	2002	Systematic Review
Kaiser B, commentary. Determinants of active commuting. Preventive Medicine 46 (2008) 8 http://minority-health.pitt.edu/908/1/04pm.pdf	2008			WC				1
Kastner M, Elizabeth Estey, Laure Perrier, Graham ID, Grimshaw J, Straus SE, Zwarenstein M,Bhattacharyya O, Understanding the relationship between the perceived characteristics of clinical practice guidelines and their uptake: protocol for a realist review. Implementation Science 2011, 6:69 (6 July 2011)	2011	Realist Review
Kastner, M, Bhattacharyya, O, Hayden, L, Makarski, J, Estey, E Durocher, L, et al: Guideline uptake is influenced by six implementability domains for creating and communicating guidelines: a realist review. J Clin Epidemiol 2014, 68(5): 498-509. doi: 10.1016/j.jclinepi.2014.12.013.	2014	Realist Review
Katzmarzyk, Peter, Norman Gledhill, and Roy Shephard, “The Economic Burden of Physical Inactivity in Canada,” Canadian Medical Association Journal, 163 (11), November 28, 2000.	2002							1
Kelaher M, Warr DJ, Theonie Tacticos Evaluating health impacts: Results from the neighbourhood renewal stratgey in Victoria, Australia. in Health place (2010)	2010							1
Killoran AJ, Fentem P, Caspersen CJ (eds) (1994) Moving on: international perspectives on promoting physical activity. Health Education Authority, London	1994							1
King AC (1998) How to promote physical activity in a community: research experiences from the US highlighting different community approaches. Patient Education and Counseling 33: S3-12.	1998							1
King AC, Stokols D, E Talen, Brassington GS, Effects of decreasing sedentary behavior and increasing activity on weight change in obese children. American Journal of …, 2002 – Elsevier	2002							1
King AC, Stokols D, Talen E, Brassington GS, Killingsworth R: Theoretical approaches to the promotion of physical activity: Forging a transdisciplinary paradigm. Am J Prev Med 2002, 23:15-25. doi: http://dx.doi.org/10.1016/S0749-3797(02)00470-1.	2002	Theory Article
Kingston C, *GONZALO CABALLERO G, Comparing Theories of Institutional Change, 16 June 2008 https://www.amherst.edu/~cgkingston/Comparing.pdf	2008	Theory Article
Kitson AL, Jo Rycroft-Malone, Gill Harvey, Brendan McCormack, Kate Seers and Angie Titchen Evaluating the successful implementation of evidence into practice using the PARiHS framework: theoretical and practical challenges. Implementation Science 2008, 3:1 doi:10.1186/1748-5908-3-1	2008				x			1
Koeneman MA, Verheijden MW, Mai JM Chinapaw M JM, Hopman-Rock M, Determinants of physical activity and exercise in healthy older adults: A systematic review. International Journal of Behavioral Nutrition and Physical Activity 2011 8:142. http://www.ijbnpa.org/content/8/1/142	2011	Systematic Review			x
Kohl HW, Cook D, and the Committee on Physical Activity and Physical Education in the school Environment, Educating the student body. Taking physical activity and physical education to school. Washington, DC: National Academic Press; 2013.	2013	Other				1
Kollmann A, Schneider F, Why Does Environmental Policy in Representative Democracies Tend to Be Inadequate? A Preliminary Public Choice Analysis, Sustainability 2010, 2, 3710-3734; doi:10.3390/su2123710 www.mdpi.com/journal/sustainability	2010					1		1
Koohsari MJ, Mavoa S, Villanueva S, Sugiyama T, Badland H et al: Public open space, physical activity, urban design and public health: Concepts, methods and research agenda. Health Place 2015, 33:75-82. doi: 10.1016/j.healthplace.2015.02.009.	2015							1
Koppenjan, J. M. (2005). The Formation of Public-Private Partnerships: Lessons from Nine Transport Infrastructure Projects in The Netherlands. Public Administration, 83(1), 135-157. doi:10.1111/j.0033-3298.2005.00441.x	2005	Theory Article			x
Koppenjan, J.; Klijn, E.-H.;Managing Uncertainties in Networks; 2004, London : Routledge. Document Type: book; (AN MUN.KOPPENJAN.ROUTLEDGE.BJJD) [	2004							1
Kreuter, M., Lezin, N., & Young, L. (2000). Evaluating community-based collaborative mechanisms: Implications for practitioners. Health Promotion Practice, 1, 49–63.	2000	Evaluation
Kriemler, S., Meyer, U., Martin, E., Van Sluijs, E.M.F., Andersen, L.B., Martin, B.W. , Effect of school-based interventions on physical activity and fitness in children and adolescents: A review of reviews and systematic update. British Journal of Sports Medicine 2011; 45 (11), pp. 923-930.	2011	Review
Krizek K, Forsyth, Baum L, Walking and Cycling International Literature Review: Final Report ,01/07/2009, Victoria Department of Transport-http://www.transport.vic.gov.au/__data/assets/pdf_file/0004/31369/WalkingCyclingLiteratureReview.pdf	2009	Systematic Review		WC		1
Kruglanski AW, Spiegel, S, Thompson EP, Higgins , E. T. , Atash , M. N. , Pierro , A. , Shah , J. Y. , & Spiegel , S. To "Do the Right Thing" or to "Just Do It": Locomotion and Assessment as Distinct Self-Regulatory Imperatives, Journal of Personality-and Social Psychology,2000, Vol. 79, No. 5, 793-815.	2000					1		1
Kruglanski, A. W., Thompson, E. P., Higgins, E. T., Atash, M. N., Pierro, A., Shah, J. Y., & Spiegel, S. (2000). To do the right thing! or to just do it!: Locomotion and assessment as distinct self-regulatory imperatives. Journal of Personality and Social Psychology, 79, 793-815.	2000	Theory Article
Kurzer P and Cooper A: Hold the croissant! The European Union declares war on obesity. J Eur Soc Policy 2011, 21:107-119. doi: 10.1177/0958928710395047.	2011	Evaluation	1
Lachat C, Van Camp J, De Henauw S, Matthys C, Larondelle Y, Remaut-De Winter AM, Kolsteren P. A concise overview of national nutrition action plans in the European Union Member States. Public Health Nutr. 2005 May;8(3):266-74.	2005							1
Lagarde F, LeBlanc C.Policy options to support physical activity in schools. Can J Public Health. 2010 Jul-Aug;101 Suppl 2:S9-13.	2010	Theory Article
Lang T, Rayner G. Overcoming policy cacophony on obesity: an ecological public health framework for policymakers. Obes Rev 2007;8(suppl):165-81	2007	Theory Article
Laperrière H, Louise Potvin, and Ricardo Zúñiga A socio-political framework for evaluability assessment of participatory evaluations of partnerships: Making sense of the power differentials in programs that involve the state and civil society . Evaluation April 2012 18: 246-259, doi:10.1177/1356389012442445	2012							1
Latimer-Cheung AE, Rhodes AE, Kho ME, Tomasone, JR, Gainforth HL, Kowalski K et al: Evidence-informed recommendations for constructing and disseminating messages supplementing the new Canadian physical activity guidelines. BioMed Central Public Health 2013, 13, 419. doi: 10.1186/1471-2458-13-419.	2013	Guidance
Lavin T, Higgins C, Metcalfe O, Jordan A. Health impacts of the built environment: a review. Dublin: Institution of Public Health in Ireland; 2006;	2006	Review				1
Lavin T, Metcalfe O, Higgins C, Active travel – healthy lives. The Institute of Public Health in Ireland, January 2011 http://www.publichealth.ie/sites/default/files/documents/files/Active%20travel%20-%20healthy%20lives.pdf	2011							1
Lawlor DA, Ness AR, Cope AM, et al. The challenges of evaluating environmental interventions to increase population levels of physical activity: the case of the UK National Cycle Network. J Epidemiol Community Health 2003;57:96–101. http://jech.bmj.com/content/57/2/96.full?ijkey=3ce04c8c26dd628b58abe6068eb72aa16880448e&keytype2=tf_ipsecsha [FREE Full text]	2003	Evaluation				1
Leadership for Healthy Communities. Advancing Policies to Support Healthy eating and Active Living: Action Strategies Toolkit. 2010. Available at: www.aap.org/obesity/community_advocacy/RWJFFull. pdf#Outdoor%20ACtivity. Accessed March 14, 2010.	2010							1
Leadership for Healthy Communities. Making the Connection: Linking Policies to Improve Public Safety with Preventing Childhood Obesity Brief. Princeton, NJ: Leadership for Healthy Communities, a National Program of the Robert Wood Johnson Foundation; 2012. Available from: www.leadershipforhealthycommunities.org.	2012							1
Lechner L, Bolman C, Van Dijke M, Factors related to misperception of physical activity in The Netherlands and implications for health promotion programmes. Health Promot. Int. (2006) 21(2): 104-112 first published online April 26, 2006 doi:10.1093/heapro/dal011	2006	Evaluation
Lee K, Developing and implementing the Active Design Guidelines in New York City. Health Place 2012, 18(1), 5-7. doi: 10.1016/j.healthplace.2011.09.009.	2012	Evaluation	1
Lee MC, Orenstein MR, Richardson MJ. Systematic review of active commuting to school and childrens physical activity and weight. J Phys Act Health. 2008 Nov;5(6):930-49.	2008	Systematic Review
Lee R E, Cubbin, C, Striding Toward Social Justice: The Ecologic Milieu of Physical Activity, Exercise & Sport Sciences Reviews, 2009,37(1):10-17.	2009	Theory Article			x
Lelieveldt, H, Princen, S (eds), 2011 The politics of the European Union. University Press, Cambridge.	2011	Evaluation	1
Lene Holm Pedersen LH, Rieper O, Is Realist Evaluation a Realistic Approach for Complex Reforms? Evaluation. 2008; 14; 271.	2008	Theory Article			x
Leone L, Review sistematiche, sintesi theory-driven e utilizzazione delle evidenze. Il caso dei programmi di prevenzione. RIV Rassegna Italiana di Valutazione, Franco Angeli, 2006, 35:55-85	2006	Method
Lewis CE, Raczynski JM, Heath GW, Levinson R, Hilyer JC, Cutter GR. Promoting physical activity in low-income African-American communities: the PARR Project. Ethn Dis. 1993;3:106–118	1993							1
Lewis J M, A network approach for researching partnerships in health, Aust New Zealand Health Policy. 2005; 2: 22. Published online 2005 October 7. doi: 10.1186/1743-8462-2-22	2005							1
Lewis J M, THE FUTURE OF NETWORK GOVERNANCE RESEARCH: STRENGTH IN DIVERSITY AND SYNTHESIS, Public Administration , 2011 Volume 89, Issue 4 (pages 1221–1234) Article first published online: 19 DEC 2011 | DOI: 10.1111/j.1467-9299.2010.01876.x	2011							1
Li F, Fisher KJ, Brownson RC, et al. Multilevel modelling of built environment characteristics related to neighbourhood walking activity in older adults. J Epidemiol Community Health 2005;59:558–64.	2005			W		1		1
Liberman J, Implications of international law for the treatment of cancer: The Single Convention on Narcotic Drugs and the TRIPS Agreement. Public Health - December 2011 (Vol. 125, Issue 12, Pages 840-846, DOI: 10.1016/j.puhe.2011.09.032	2011							1
Lie A, COORDINATION PROCESSES AND OUTCOMES IN THE PUBLIC SERVICE: THE CHALLENGE OF INTER-ORGANIZATIONAL FOOD SAFETY COORDINATION IN NORWAY (pages 401–417) 23 JUL 2010 | DOI: 10.1111/j.1467-9299.2010.01845.x	2010							1
Lien G, K. DeLand Translating the WHO Framework Convention on Tobacco Control (FCTC): Can we use tobacco control as a model for other non-communicable disease control?Public Health - December 2011 (Vol. 125, Issue 12, Pages 847-853, DOI: 10.1016/j.puhe.2011.09.022)	2011							1
Limstrand T. Environmental characteristics relevant to young people’s use of sports facilities: A review. Scandanavian J Med & Sci Sports 2008;18(3):275-87.	2008	Review				1
Lindsay I, Tackling the dangers of inactivity through sport. J Int Centre Sport Security J 2013, 1(4):99-101.	2013	Evaluation	1
Lister-Sharp D, Chapman S, Stewart-Brown S, Sowden, A (1999) Health promoting schools and health promotion in schools: two systematic reviews. Health Technology Assessment 3: 1-207.	1999	Review
Lloyd JJ, Logan S, Colin J Greaves, Katrina M Wyatt, Evidence, theory and context - using intervention mapping to develop a school-based intervention to prevent obesity in children. Nutrition and Physical Activity 2011, 8:73.	2011							1
Lobelo, F., Duperly, J., Frank, E., 2009. Physical activity habits of doctors and medical students influence their counselling practices. Br. J. Sports Med. 43, 89–92.	2009	Evaluation
Lobstein T, Baur LA, Policies to prevent childhood obesity in the European Union. European Journal of Public Health, 2007,Vol. 15, No. 6f, 576–579	2007							1
Loewenstein G, Brennan T, Volpp KG. Asymmetric paternalism to improve health behaviors. JAMA 2007;298:2415–2417. (Parziale)	2007							1
Lounsbery MAF, McKenzie TL, Trost S, Smith NJ. Facilitators and barriers to adopting evidence-based physical education in elementary schools. J Phys Act Health. 2011;8(Suppl 1):S17–S25.	2011	Evaluation
Lowi TJ, i American business, public policies, Case-Studies, and Political Theory. World Politics, XVI, 1964 http://www.nomorepolitics.info/nida/sombat/014.pdf	1964							1
Macaulay AC, Jagosh J, Seller R, Henderson J, Cargo M, Greenhalgh T, Wong G, Salsberg J, Green LW, Herbert CP, Pluye P: Assessing the benefits of participatory research: a rationale for a realist review. Global Health Promotion, Glob Health Promot. 2011 Jun;18(2):45-8.	2011	Realist Review
Macdonald G, Veen C, Tones K.,Evidence for success in health promotion: suggestions for improvement. Health Educ Res. 1996 Sep;11(3):367-76. http://her.oxfordjournals.org/content/11/3/367.long	1996							1
Macniven R, Olsen B, Shilton T, Bauman A, The initial development and process evaluation of AusPAnet: the Australian Physical Activity Network. Health Promotion Journal of Australia19. 1 (Apr 2008): 36-9.	2008							1
Maddock J, Takeuchi L, Nett B et al. Evaluation of a statewide program to reduce chronic disease: The Healthy Hawaii Initiative, 2000-2004. Evaluation and Program Planning. 2006;29:293-300. DOI: 10.1016/j.evalprogplan.2005.12.007. RECUP	2006	Evaluation
Magnusson R, Using a legal and regulatory framework to identify and evaluate priorities for cancer prevention.Public Health - December 2011 (Vol. 125, Issue 12, Pages 854-875, DOI: 10.1016/j.puhe.2011.10.003)	2011							1
Mahtani KR, Protheroe J, Slight SP, Demarzo MM, Blakeman T, Barton CA, et al: Can the London 2012 Olympic ‘inspire a generation’ to do more physical or sporting activities? An overview of systematic reviews. BMJ Open 2013, 3:1-8. doi: 10.1136/bmjopen-2012-002058.	2013	Systematic Review	1
Mannheimer L N , Lehto J, Östlin P. Window of opportunity for intersectoral health policy in Sweden—open, half-open or half-shut? Health Promot. Int. (2007) 22 (4): 307-315. http://heapro.oxfordjournals.org/content/22/4/307.long	2007							1
Marcus BH, Forsyth LH (1999) How are we doing with physical activity? American Journal of Health Promotion 14: 118-124.	1999							1
Marcus BH, Owen N, Forsyth LH, Cavill NA, Fridinger F (1998) Physical activity interventions using mass media, print media and information technology. American Journal of Preventive Medicine 15: 362-378.	1998							1
Marmot M, Wilkinson RMcCarthy M. Transport and health. In: Marmot M, Wilkinson R, eds. Social determinants of health. Oxford: Oxford University Press, 1999.	1999	Evaluation
Marshall AL, Owen N, Bauman AE (2004) Mediated approaches for influencing physical activity: update of the evidence on mass media, print, telephone and website delivery of interventions. Journal of Science and Medicine in Sport 7: 74-80.	20014							1
Marshall GR., Nesting, subsidiarity, and community-based environmental governance beyond the local level. International Journal of the Commons. Vol 2, no 1 January 2008, pp. 75-97. URL: http://www.thecommonsjournal.org	2008	Theory Article				1
Marshall, S.J., & Ramirez, E. (2011). Reducing sedentary behavior: a new paradigm for physical activity promotion. American Journal of Lifestyle Medicine. e-pub ahead of print February 16, 2011:1-13.	2011	Theory Article
Martin B et al. Evidence-based physical activity promotion – HEPA Europe: the European Network for the Promotion of Health-Enhancing Physical Activity. Journal of Public Health, 2006, 14:53–57.	2006							1
Martin B, Kahlmeier S, Racioppi F, Berggren F, Miettinen M, Oppert J-M, Rutter H, Šlachta R, van Poppel M, Zakotnik J, Meusel D, Oja P, Sjöström M. Evidence-based physical activity promotion - HEPA Europe, the European Network for the Promotion of Health-Enhancing Physical Activity. Journal of Public Health. 2006;14 (2):53-57	2006	Review			x
Martin B, Martin-Diener E, Balandraux-Olivet M, Mäder U, Ulrich U (eds) (2004). Transport related health impacts—costs and benefits with a particular focus on children. Transnational project and workshop series of Austria, France, Malta, Sweden, Switzerland and the Netherlands. Topic report physical activity. Contribution to the UNECE-WHO Pan-European Programme for Transport, Health and Environme…	2004	Evaluation			x	1
Martin B, Physical activity promotion in Europe. The role of the Netherlands in past, present and future, HEPA 2009. Journal of Public Health Volume 14, Number 2, 53-57, DOI: 10.1007/s10389-006-0029-5	2009							1
Martin BW, Kahlmeier S, Racioppi F, Berggren F, Miettinen M, Oppert J,y Rutter H, Šlachta R, van Poppel M, Zakotnik JM, Meusel D, Oja P, Sjöströml M. Evidence-based physical activity promotion – HEPA Europe: the European Network for the Promotion of Health-Enhancing Physical Activity. Journal of Public Health, 2006, 14:53–57. http://www.panh.ch/hepaeurope/materials/Journal%20of%20public%20heal…	2006							1
Martin BW, Mäder U, Stamm HP, Braun-Fahrländer C: Physical activity and health - what are the recommendations and where do we find the Swiss population? Schweiz Z Sportmed Sporttraumatol 2009, 57(2):37-43.	2009	Guidance
Martin, S. B., J. R. Morrow, JR., A. W. Jackson, and A. L. Dunn. Variables related to meeting the CDC/ACSM physical activity guidelines. Med. Sci. Sports Exerc., Vol. 32, No. 12, 2000, pp. 2087–2092.	2000							1
Martinez, S., Coleman, K., Candelaria, J., Terpstra, J., Ainsworth, B., Patrick, K., Elder, J. (2006, February). Needs and assets mapping in low-income communities: A case study of using multiple methods and technology to promote physical activity in Latino families (ppt). Poster session presented at the 3rd Annual Active Living Research Conference, Coronado, CA.	2006	Evaluation
Martinez, S.M., Arredondo, E.M., Ayala, G.X., Patrick, K., Roesch, Elder, J.P. (November, 2007). Acculturation and psychosocial correlates of physical activity in a Latino Community. Round Table presented at APHA 135th Annual Meeting and Expo, Washington D.C. (coming soon).	2007							1
Maselli D, Lys JA, Schmid J: Improving Impacts of ResearchPartnerships. 2006, Swiss Commission for Research Partnerships with Developing Countries, KFPE http://www.kfpe.ch/download/KFPE_ImpactStudy-final.pdf	2006							1
Mathews AE, Pluto D, Ogoussan O, Banda J: Active travel to school: policies and attitudes of school and district leaders. J Phys Act Health 2010, 7 Suppl.1:S13-19.	2010	Evaluation	1
Matson-Koffman DM, Brownstein JN, Neiner JA, Greaney ML (2005) A site-specific literature review of policy and environmental interventions that promote physical activity and nutrition for cardiovascular health: what works? American Journal of Health Promotion 19: 167-193.	2005	Evaluation				1
Matsudo SM, Matsudo VR, Andrade DR, Araújo TL, Andrade E, de Oliveira L, Braggion G (2004) Physical activity promotion: experiences and evaluation of the Agita São Paulo program using the ecological mobile model. J Phys Act Health 1:81–97	2004							1
Matsudo SM, Matsudo VR, Araujo TL, Andrade DR, Andrade EL, de Oliveira LC, et al. The Agita Sao Paulo Program as a model for using physical activity to promote health. Rev Panam Salud Publica. 2003;14:265–72. doi: 10.1590/S1020-49892003000900007. [PubMed] [Cross Ref]	2003	Evaluation
Matsudo V, Matsudo S, Araujo T et al. Time Trends in Physical Activity in the State of Sao Paulo, Brazil:2002-2008. Med Sci Sports Exerc 2010. RECUP	2010	Evaluation
Mayer JP, Sweid R, Dabney S, Brownson C, Goodman RM, Brownson RC. Practices of successful community coalitions: a multiple case study. Am J Health Behav 1998;22(5):368-77.	1998	Evaluation
Mays GP, Scutchfield FD. Improving public health system performance through multiorganizational partnerships. Prev Chronic Dis. 2010 Nov;7(6):A116. Epub 2010 Oct 15	2010							1
MAYS N., WYKE S, EVANS D, The Evaluation of Complex Health Policy. Lessons from the UK Total Purchasing Experiment.Evaluation. 2001,Vol 7(4): 405–426.	2001	Theory Article
McCartney G, S. Palmer, J. Winterbottom, R. Jones, Kendall R., Booker D., A health impact assessment of the 2014 Commonwealth Games in Glasgow, Public Health. 2010 August; 124(8-2): 444–451.	2010	Evaluation
McCormack B, Dewar B, Wright J,Garbett R, G,Ballantine K, A realist synthesis of evidence relating to practice. Development: final report to NHS Education for Scotland and NHS quality improvement Scotland, MAY 2006 http://www.nhshealthquality.org/nhsqis/files/Final%20report.pdf	2006	Systematic Review
McCormack B., Rycroft-Malone J, DeCorby K, Hutchinson AM, Bucknall T, Kent B, Schultz A, Snelgrove-Clarke E, Stetler C, Titler M, Wallin L: A realist review of interventions and strategies to promote evidence-informed healthcare: a focus on change agency Implement Sci 2013:8,107. doi: 10.1186/1748-5908-8-107	2013	Realist Review
McCormack GR, Shiell A. In search of causality: A systematic review of the relationship between the built environment and physical activity among adults. International Journal of Behavioral Nutrition and Physical Activity. 2011;8(1):n/a-125.	2011	Systematic Review				1
Mccreedy M, Leslie JG. Get Active Orlando: changing the built environment to increase physical activity. Am J Prev Med 2009;37(6S2):S395–S402. 24. Dobson NG, Gilroy AR. From partnership to policy: the evolution of Active Living by Design in Portland, Oregon. Am J Prev Med 2009;37(6S2):	2009					1		1
McDonald, NC, Active Transportation to School. Trends Among U.S. Schoolchildren, 1969–2001. Am J Prev Med 2007;32(6):509–516) © 2007 American Journal of Preventive Medicine http://dot.ga.gov/localgovernment/FundingPrograms/srts/Documents/news/Trends_Among_US_School_Children.pdf	2007				x			1
McGUIRE M, AGRANOFF R, THE LIMITATIONS OF PUBLIC MANAGEMENT NETWORKS (pages 265–284) 21 MAR 2011 | DOI: 10.1111/j.1467-9299.2011.01917.x	2011				x			1
McKenzie, T.L., Cohen, D.A., Sehgal, A., Williamson, S., & Golinelli, D. (2006). System for Observing Play and Recreation in Communities (SOPARC): Reliability and feasibility measures. Journal of Physical Activity & Health, 3, Suppl 1, S208-S222.	2006							1
McKinnon RA. McKinnon, Bowles HR, Trowbridge MJ, Engaging Physical Activity Policymakers, Journal of Physical Activity and Health, 2011, 8(Suppl 1), S145-S147.	2011							1
Meijers E, Stead D,Policy integration: what does it mean and how can it be achieved? A multi-disciplinary review. Pepr presented at 2004 Berlin Conference on the Human Dimensions of Global Environmental Change: Greening of Policies – Interlinkages and Policy Integration. http://userpage.fu-berlin.de/ffu/akumwelt/bc2004/download/meijers_stead_f.pdf	2004	Review				1
Melissa C Brouwers, Kimberly Garcia, Julie Makarski, Lubna Daraz, The landscape of knowledge translation interventions in cancer control: What do we know and where to next? A review of systematic reviews . Implementation Science 2011, 6:130	2011	Review					1
Mendoza JA, Salmon J, Sallis JF, Guest editorial. Partnerships for progress in active living: from research to action, Health & Place 2012(8):1-4 http://ac.els-cdn.com/S1353829211001869/1-s2.0-S1353829211001869-main.pdf?_tid=73cb408e-2c0b-11e6-86cf-00000aacb35f&acdnat=1465234018_9712339cc2e0c562a8deab1ea9045fad	2012							1
Mendoza JA, Levinger DD, Johnston BD, Pilot evaluation of a walking school bus program in a low-income, urban community. BMC Public Health 2009, 9:122	2009	Evaluation		WC
Mendoza JA, Salmon J, Sallis JF, Partnerships for progress in active living: From research to action. Guest editorial. Health & Place 18 (2012) 1–4. http://www.sciencedirect.com/science/journal/13538292/18/1	2012	Theory Article
Mercer SL, Green LW, Rosenthal AC, Husten CG, Khan LK, Dietz WH. Possible lessons from the tobacco experience for obesity control. Am J Clin Nutr. 2003;77(suppl 4):1073S–1082S	2003				x			1
Metcalf BS, Hosking J, Jeffery AN, Voss LD, Henley W, Wilkin TJ: Fatness leads to inactivity, but inactivity does not lead to fatness: a longitudinal study in children (EarlyBird 45). Arch Dis Child 2011, 96:942-947. doi: 10.1136/adc.2009.175927.	2011	Evaluation	1
Meter K , The Neighborhood Sustainability Indicators Guidebook, Crossroads Resource Center Urban Ecology Coalition, 1999 Minneapolis, Minnesota http://www.crcworks.org	1999	Method
Meyer MD, Dumbaugh E.Institutional and Regulatory Factors Related to Nonmotorized Travel and Walkable Communities. Washington: Prepared for the Transportation Research Board and the Institute of Medicine Committee on Physical Activity, Health, Transport, and Land Use. http://userpage.fu-berlin.de/	2004	Evaluation
Michie S, Pilling S, Garety P, Whitty P, Eccles,MP, Johnston M et al: Difficulties implementing a mental health guideline: an exploratory investigation using psychological theory. Implementation Sci 2007, 2:8. doi: 10.1186/1748-5908-2-8.	2007							1
Michie S. Designing and implementing behaviour change interventions to improve population health. J Health Serv Res Policy 2008 13: 64 DOI: 10.1258/jhsrp.2008.008014	2008	Theory Article
Middlemiss L K, The role of community-based organisations in stimulating sustainability practices among participants. The University of Leeds School of Earth and Environment, 2009 http://homepages.see.leeds.ac.uk/~leclkm/index_files/LucieMiddlemissPhDFullCopy.pdf	2009							1
Middlemiss L. 2011. The effects of community-based action for sustainability on participant lifestyles. Local Environment, 16:3, pp. 265-280.	2011	Evaluation
Middlemiss, L. 2010. Community action for individual sustainability: linking sustainable consumption, citizenship and justice. in Pavlich, D. (Ed.) Environmental Justice and Global Citizenship. Amsterdam: Rodopi.	2010							1
Middlemiss, L. 2011. The power of community: how community-based organisations stimulate sustainable lifestyles among participants. Society and Natural Resources, 24, pp. 1157-1173.	2011							1
Middlemiss, L.K. 2008. Influencing Individual Sustainability: a review of the evidence on the role of community-based organisations In: International Journal of Environment and Sustainable Development, 7 (1) 78-93	2008	Review
Middlemiss, L.K. 2010. Reframing Individual Responsibility for Sustainable Consumption: Lessons from Environmental Justice and Ecological Citizenship, Environmental Values, 19, 147-167.	2010					1		1
Middlemiss, L.K. and Parrish, B. 2010. Building capacity for low-carbon communities: The role of grassroots initiatives, Energy Policy, 38:12, pp. 7559-7566.	2010	Theory Article
Miilunpalo S (2001), Evidence and theory based promotion of health-enhancing physical activity, Public Health Nutrition, 4(2B), 725-728.	2001	Theory Article
Mikkelsen BE. Int J Pediatr Obes. 2011 Oct;6 Suppl 2:8-11.Policies to promote on physical activity and healthy eating in kindergartens from theory to practice.	2011	Evaluation
Miller EK, Scofield JL. Slavic Village: incorporating active living into community development through partnerships. Am J Prev Med 2009; 37(6S2):S377–S385.	2009	Theory Article
Milton B, Moonan M, Robinson DT, Whitehead M, How can the health equity impact of universal policies be evaluated. World Health Organization Europa http://www.euro.who.int/__data/assets/pdf_file/0019/155062/E95912.pdf	2011	Method
Minister of Health Promotion, Community physical activity planning: a resource manual. Toronto, Ministry of Health Promotion, Ontario, CA 2006 www.mhp.gov.on.ca/english/sportandrec/PlanningResrceManual_FINAL.pdf	2006	Guidance
Minister Transport, Raising the Profile Walking Cycling, New Zealand, 2008	2008			WC				1
Ministry of Interior and Health. Healthy throughout Life: The Targets and Strategies for Public Health Policy of the Government of Denmark 2002–2010. Copenhagen: Ministry of Interior and Health of Denmark, 2003.	2003	Plan
Mishra L, Banerjee AT, MacLennan ME, Gorczynski PF, Zinszer KA.,Wanted: interdisciplinary, multidisciplinary, and knowledge translation and exchange training for students of public health. Can J Public Health. 2011 Nov-Dec;102(6):424-6. Review.	2011	Theory Article					1
Mistry R, Placing Health: Neighbourhood Renewal, Health Improvement and Complexity. Journal of Epidemiology and Community Health, 2008;62:4 375 doi:10.1136/jech.2007.067439	2008	Method
Mittelmark MB, Fosse E, Jones C, Davies M, Davies JK, Capacity building. Mapping European Capacity to Engage in Health Promotion at the National Level: HP-Source.net IUHPE – Promotion & Education Supplement 2005 (1), 33-68.	2005							1
Mittelmark MB, Promoting social responsibility for health: health impact assessment and healthy public policy at the community level .Health Promot. Int. (2001) 16(3): 269-274 doi:10.1093/heapro/16.3.269	2001							1
Mittelmark MB, Wise M, Eun Woo Nam, Santos-Burgoa C, Fosse E, Saan H, Hagard S, and Kwok Cho Tang, Mapping national capacity to engage in health promotion: Overview of issues and approaches. Health Promotion International Health Promot. Int. (2006) 21 (suppl 1): 91-98. ISSN: 0957-4824	2006							1
MoodieR, Where Different Worlds Collide: Expanding the Influence of Research and Researchers on Policy Moodie, Rob. Journal of Public Health Policy, suppl. SUPPLEMENT 1: Connecting Active Living Research to Policy.. 30 (2009): S33-7.	2009	Theory Article
Moran MR, Plaut P, Merom D. Is the Grass Always Greener in Suburban Neighborhoods? Outdoors Play in Suburban and Inner-City Neighborhoods. Int J Environ Res Public Health. 2017 Jul 11;14(7). pii: E759. doi: 10.3390/ijerph14070759.	2017	Other				1
Morgan A, Ziglio E, Revitalising the evidence base for public health: an assets model, Promotion & Education, 2007; 14; 17.	2007	Review
Morrison D, Petticrew M, Thomson H (2003) What are the most effective ways of improving population health through transport interventions? Evidence from systematic reviews. Journal of Epidemiology and Community Health 57: 327-333.	2003							1
Morrison, D.S., Thomson, H., et al., 2004. Evaluation of the health effects of a neighbourhood traffic calming scheme. J. Epidemiol.Community Health 58 (10),837–840.	2004	Evaluation
Mukoma W, Flisher AJ (2004) Evaluations of health promoting schools: a review of nine studies. Health Promotion International 19: 357-368.	2004	Evaluation
Mumford S., Truth makers for judgement calls, European Journal of Sport Science, September 2006; 6(3): 179-186.	2006							1
Mummery WK, W J Brown Whole of community physical activity interventions: easier said than done. Br J Sports Med 2009;43:39-43 doi:10.1136/bjsm.2008.053629	2009							1
Murphy K, Fafard P, O’Campo P: Introduction-knowledge translation and urban health equity: advancing the agenda. J Urban Health 2012, 89:875-880. doi: 10.1007/s11524-012-9693-7.	2012	Theory Article					1
Murphy NM, Bauman A (2007) Mass sporting and physical activity events--are they "bread and circuses" or public health interventions to increase population levels of physical activity? Journal of Physical Activity and Health 4: 193-202.	2007							1
Murphy S, Raisanen L, Moore G, Edwards RT, Linck P, et al. The evaluation of the National Exercise Referral Scheme in Wales. 2010 Welsh Assembly Government Social Research, 2010 http://wales.gov.uk/docs/caecd/research/101104nationalexerciseschemeen.pdf	2010							1
Mutrie N, Carney C, Blamey A, Crawford F, Aitchison T, Whitelaw A. “Walk in to work out”: a randomised controlled trial of a self help intervention to promote active commuting. J Epidemiol Community Health 2002;56:407-12.	2002	Evaluation		W
National Institute for Health and Clinical Excellence (NICE): Implementation advice: four commonly used methods to increase physical activity. Public Health Intervention Guidance PH2. NICE, London, 2006.	2006	Guidance
National Institute for Health and Clinical Excellence (NICE): Physical activity in the workplace. Public health guidance PH13. London: NICE; 2008. https://www.nice.org.uk/guidance/ph13 [last accessed 16 May 2016]	2008	Guidance
National Institute for Health and Clinical Excellence (NICE): Walking and cycling. Public health guidance PH41. NICE, London, 2012. https://www.nice.org.uk/guidance/ph41 [last accessed 16 May 2016]	2012	Guidance	1
National Physical Activity Guidelines for Adults. Australian Government Department of Health and Ageing, 2005. (http://www.health.gov.au/internet/main/publishing.nsf/Content/health-pubhlth-strateg-phys-act-guidelines, accessed 11 January 2010)	2005	Guidance
National Physical Activity Plan , 2016 USA www.physicalactivityplan.org/NationalPhysicalActivityPlan.pdf	2016	Plan		WC
National Public Health Partnership Be Active Australia: A Framework for Health Sector Action for Physical Activity 2005 – 2010 http://www.nphp.gov.au/publications/documents/nphp_baa_aug_05_no_cover.pdf	2005							1
National Research Council. "Front Matter." Does the Built Environment Influence Physical Activity? Examining the Evidence -- Special Report 282. Washington, DC: The National Academies Press, 2005. 1. Print.	2005	Evaluation				1
Nemet D, Geva D, Meckel Y, Eliakim A, Health-related knowledge and preferences in low socio-economic kindergarteners. Int J Behav Nutr Phys Act. 2012; 9: 1.	2012							1
NHS (2005), Choosing Activity: a physical activity action plan, National Health Service, Department of Health Publications, London.	2005	Plan
NHS National Institute for Health and Clinical Excellence, PH2 Four commonly used methods to increase physical activity: guidance .29 March 2006 www.nice.org.uk/page.aspx?o=PhysicalActivityandEnv. http://www.nice.org.uk/guidance/PH2/guidance	2006	Guidance
NICE ‘Physical activity and the environment review one: transport review’ -‘Physical activity and the environment review five: building design review’. 23 January 2008 www.nice.org.uk/PH008	2008	Guidance				1
NICE (2006) Transport interventions promoting safe cycling and walking: evidence briefing. London: National Institute for Health and Clinical Excellence.	2006	Guidance
NICE Pathway to physcial activity. NHS UK http://pathways.nice.org.uk/pathways/physical-activity	2011	Guidance
NICE Promoting and creating built or natural environments that encourage physical activity Publication date: 20/01/2008 Publisher: This Guidance outlines recommendations on promoting and creating built or natural environments that encourage and support physical activity	2008	Review				1
NICE, PH8 Physical activity and the environment: guidance.23 January 2008 http://www.nice.org.uk/guidance/PH8/Guidance/doc	2008	Guidance				1
NICE, PH9 Community engagement: guidance 12 July 2010	2010	Guidance
NICE, Workplace health promotion: How to encourage employees to be physically active. Publication date: 01/05/2008 .	2008	Systematic Review
Nguyen, S.; Häcker, A.L.; Henderson, M.; Barnett, T.; Mathieu, M.E.; Pagani, L.; Bigras, J.L. Physical Activity Programs with Post-Intervention Follow-Up in Children: A Comprehensive Review According to Categories of Intervention. Int J Environ Res Public Health, 2016, 13, 664; DOI:10.3390/ijerph13070664	2016	Systematic Review
North D, Institutional change: A framework of analysis, 1998 http://129.3.20.41/eps/eh/papers/9412/9412001.pdf	1998	Theory Article
Nowell, B., Foster-Fishman, P. Examining Multi-Sector Community Collaboratives as Vehicles for Building Organizational Capacity. American Journal of Community Psychology 48 (3-4) , pp. 193-207	2011							1
Noyes J, Qualitative Evidence Synthesis: Meta-synthesis or Meta-morphosis?Conceptual and methodological rigour: some current limitations, 2008 (Slide) Cochrane Qualitative Research Methods Group www.joannabriggs.edu.au/cqrmg	2008	Systematic Review
Nutley S, Davies H, and Walter I: Evidence based policy and practice: Cross sector lessons from the UK. WP 9. London: Centre for Evidence Based Policy and Practice ESRC; 2002.	2002	Method
O'Donovan G, Blazevich AJ, Boreham C, Cooper AR, Crank H, Ekelund U, Fox KR et al: The ABC of physical activity for health: a consensus statement from the British Association of Sport and Exercise Sciences. J Sports Sci 2010, 28(6): 573-591. doi: 10.1080/02640411003671212.	2010	Guidance
O'Hara B J, Adrian E. Bauman, Elizabeth G. Eakin, Lesley King, Marion Haas, Margaret Allman-Farinelli, Neville Owen, Magnolia Cardona-Morell, Louise Farrell, Andrew J. Milat and Philayrath Phongsavan, Evaluation Framework for Translational Research : Case Study of Australia's Get Healthy Information and Coaching service, Health Promot Pract 2013 14: 380	2013							1
O'Malley Grace C, Baker Philip RA, Francis Daniel P, Perry Ivan, Foster Charles. Incentive-based interventions for increasing physical activity and fitness. Cochrane Database of Systematic Reviews: Protocols 2012 Issue 1 John Wiley & Sons, Ltd Chichester, UK DOI: 10.1002/14651858.CD009598 http://www.mrw.interscience.wiley.com/cochrane/clsysrev/articles/CD009598/frame.htm	2012	Systematic Review
O’Donovan G & Shave R (2007). British adults’ views on the health benefits of moderate and vigorous activity. Preventative Medicine, DOI: 10.1016/j.ypmed.2007.07.026 (Abstract http://www.sciencedirect.com/science/article/pii/S0091743507003210)	2007	Other
O’Neill M, Lemieus V, Groleau G, Frotin J, Lamarche P. Coalition theory as a framework for understanding and implementing intersectoral health-related inter-ventions. Health Promot Int 1997;12(1):79-87.	1997							1
OECD Organization for Economic cooperation and Development, Healthy Choices, OECD Health Ministerial Meeting, Paris, 7-8 October 2010.http://www.oecd.org/dataoecd/14/13/46098333.pdf	2010							1
Ogilvie D et al. Evaluating health effects of transport interventions: methodologic case study. American Journal of Preventive Medicine, 2006, 31:118–126.	2006	Evaluation
Ogilvie D et al. Evaluating the travel, physical activity and carbon impacts of a 'natural experiment' in the provision of new walking and cycling infrastructure: methods for the core module of the iConnect study. BMJ Open 2012;2:e000694 doi:10.1136/bmjopen-2011-000694	2012	Evaluation
Ogilvie D, Bull F, Powell J, Cooper AR, PhD., Brand C, Mutrie N, et al. An applied ecological framework for evaluating infrastructure to promote walking and cycling: The iConnect study. Am J Public Health. 2011;101(3):473-81.	2011	Evaluation		WC
Ogilvie D, Egan M, Hamilton V, Petticrew M. Systematic reviews of health effects of social interventions: 2. Best available evidence: how low should you go?J Epidemiol Community Health. 2005;59(10):886–892. http://ajph.aphapublications.org/doi/full/10.2105/AJPH.2010.300067	2005	Systematic Review
Ogilvie D, Egan, M, Hamilton V, Petticrew M: Theory and methods of systematic reviews of health effects of social interventions: 2. Best available evidence: how low should you go? J Epidemiol Community Health 2005, 59(10):886-892.	2005	Method	1
Ogilvie D, Foster CE, Rothnie H, Cavill N, Hamilton V, Fitzsimons CF, Mutrie N (2007) Interventions to promote walking: systematic review. BMJ 334: 1204.	2007							1
Ogilvie D, Peter Craig, Simon Griffin, Sally Macintyre, Nicholas J Wareham. A translational framework for public health research. BMC Public Health. 2009; 9: 116. Published online 2009 April 28. doi: 10.1186/1471-2458-9-116	2009	Theory Article
Ogilvie, D., Griffin, S., Jones, A., Mackett, R., Guell, C., Panter, J., . . . Chapman, C. (2010). Commuting and health in cambridge: A study of a natural experiment in the provision of new transport infrastructure. BMC Public Health, 10(1), 703-703. doi:10.1186/1471-2458-10-703	2010	Evaluation
Oja P., Bull F C., Fogelholm M and MartinB W., Physical activity recommendations for health: what should Europe do? BMC Public Health 2010, 10:10.	2010	Guidance
Oja, P, Vuori, I. Promotion of transport walking and cycling in Europe: strategy directions. The European Network for the Promotion of Health-Enhancing Physical Activity. Tampere, UKK Institute, 2000.	2000	Other
Olgivie D, Griffin S, Jones A, Mackett R, Guell C, Panter J, Jones N, Cohn S, Yang L, ChapmanC, Commuting and health in Cambridge: a study of a ‘natural experiment’ in the provision of new transport infrastructure. BMC Public Health 2010, 10:703	2010	Review
Olsen L, ALLENSWORTh D, School Health Education - Characteristics of Effective Programs, Conclusion.		Review
Olsson, P., C. Folke, and T. Hahn. 2004. Social-ecological transformation for ecosystem management: the development of adaptive co-management of a wetland landscape in southern Sweden. Ecology and Society 9(4):2. [online] URL: http://www.ecologyandsociety.org/vol9/iss4/art2/.	2004	Theory Article
Olsson, P., C. Folke, V. Galaz, T. Hahn, and L. Schultz. 2007. Enhancing the fit through adaptive co-management: creating and maintaining bridging functions for matching scales in the Kristianstads Vattenrike Biosphere Reserve Sweden. Ecology and Society 12(1):28. [online] URL: http://www.ecologyandsociety.org/vol12/iss1/art28/.	2007	Theory Article
Omishakin AA, Carlat JL, Hornsby S, Buck T. Achieving built-environment and active-living goals through Music City Moves. Am J Prev Med 2009;37(6S2):S412–S419.	2009	Other				1
Ommundsen Y, Klasson-Heggebø L, and Sigmund A Anderssen, Psycho-social and environmental correlates of location-specific physical activity among 9- and 15- year-old Norwegian boys and girls: the European Youth Heart Study. Int J Behav Nutr Phys Act. 2006; 3: 32. doi: 10.1186/1479-5868-3-32	2006	Evaluation				1
OPMUS, ISFORT www.isfort.it/sito/ricerca/opmus/Index_studi.htm				WC	x			1
Orleans CT, Gruman J, Ulmer C, Emont SL, Hollendonner JK (1999) Rating our progress in population health promotion: report card on six behaviors. American Journal of Health Promotion 14: 75-82.	1999							1
Ottoson JM, Green LW, Beery WL, Senter SK, Cahill CL, Pearson DC, Greenwald HP, Hamre R, Leviton L.Policy-contribution assessment and field-building analysis of the Robert Wood Johnson Foundation's Active Living Research Program.Am J Prev Med. 2009 Feb;36(2 Suppl):S34-43. doi: 10.1016/j.amepre.2008.10.010.	2009							1
Outcomes from the women's wellness project: A community-focused physical activity trial for women.Preventive Medicine Volume: 43, Issue: 6, December, 2006, pp. 447-453	2006							1
Owen N; Glanz, Karen; Sallis, James F.; Kelder, Steven H. Evidence-Based Approaches to Dissemination and Diffusion of Physical Activity Interventions. American Journal of Preventive Medicine Volume: 31, Issue: 4, Supplement, October, 2006, pp. 35-44	2006	Evaluation
Pablo AL, Reay T, Dewald JR, Casebeer AL: Identifying, enabling and managing dynamic capabilities in the public sector. J Manage Stud 2007, 44:687-708.	2007							1
Pangrazi RP, Beighle A, Vehige T, Vack C. Impact of promoting lifestyle activity for youth (PLAY) on children's physical activity. J Sch Health. 2003;73:317–321.	2003	Systematic Review
Panter J, Griffin S, Jones A, Mackett R, Ogilvie D, Correlates of time spent walking and cycling to and from work: baseline results from the commuting and health in Cambridge study. International Journal of Behavioral Nutrition and Physical Activity8. 1 (2011): 124.	2011	Evaluation
Parker DR, Assaf AR (2005) Community interventions for cardiovascular disease. Primary Care 32: 865-881.	2005							1
Parry N ( 2010), Network of cities tackles age-old problems, Bull World Health Organ 2010; 88:406–407.	2010							1
Partnership for a Walkable America [web site]. Chapel Hill, Pedestrian and Bicycle Information Center, 2007 (http://www.walkableamerica.org, accessed 14 May 2007).	2007	Other
Partnership for Prevention. Social Support for Physical Activity: Establishing a Community-Based Walking Group Program to Increase Physical Activity Among Youth and Adults—An Action Guide.The Community Health Promotion Handbook: Action Guides to Improve Community Health. Washington, DC: Partnership for Prevention; 2008.	2008	Guidance		WC
Pate RR, Davis MG, Robinson TN, Stone EJ, McKenzie TL, Young JC: Promoting physical activity in children and youth: a leadership role for schools: a scientific statement from the American Heart Association Council on Nutrition, Physical Activity, and Metabolism (Physical Activity Committee) in collaboration with the Councils on Cardiovascular Disease in the Young and Cardiovascular Nursing. Circu…	2006	Guidance
Pate RR, Trost SG, Mullis R, Sallis JF, Wechsler H, Brown DR (2000) Community interventions to promote proper nutrition and physical activity among youth. Preventive Medicine 31: S138-S149.	2000							1
Paterson DH, Jones GR, Rice CL. Ageing and physical activity: evidence to develop exercise recommendations for older adults. Applied Physiology, Nutrition and Metabolism, 2007, 32:S69–S108. )	2007	Systematic Review
Paton C., Health Policy: Overview, International Encyclopedia of Public Health, 2008, Pages 211-225.	2008	Review			x
Pavey TG, Anokye N, Taylor AH, et al. The clinical effectiveness and cost-effectiveness of exercise referral schemes: a systematic review and economic evaluation. Health Technol Assess. 2011 Dec;15(44):i-xii, 1-254. (Review) PMID: 22182828 http://www.hta.ac.uk/execsumm/summ1544.htm	2011	Systematic Review
Pawson R, Manzano-Santaella A, A realist diagnostic workshop . Evaluation April 2012 18: 176-191, doi:10.1177/1356389012440912	2012							1
Pawson R, Greenhalgh T, Harvey G, et al. Realist synthesis: an introduction. ESRC Research methods programme, University of Manchester. RMP methods paper 2/2004.	2004	Method
Pawson R, Greenhalgh T, Harvey G, Walshe K: Realist review: a new method of systematic review designed for complex policy interventions. Journal of Health Services Research & Policy 2005, 10:21	2005	Method
Pawson R, Owen L, Wong G: Legislating for health: locating the evidence. J Public Health Policy 2010, 31:164-177. doi:10.1057/jphp.2010.5.	2010	Evaluation
Pawson R: Evidence-based policy: a realist perspective. London: SAGE Publications Ltd.; 2006	2006	Method
Pawson R. Legislation for health 2010 http://www.nice.org.uk/nicemedia/live/11882/48643/48643.ppt	2010	Method
Peirson L,Ciliska D, Dobbins M, Mowat D, Building capacity for evidence informed decision making in public health: a case study of organizational change. BMC Public Health 2012, 12:137 doi:10.1186/1471-2458-12-137.http://www.biomedcentral.com/1471-2458/12/137/abstract	2012							1
Pesce C and Ben-Soussan D: 'Cogito ergo sum' or 'ambulo ergo sum'? New perspectives in developmental exercise and cognition research. Exercise-Cognition Interaction: Neuroscience Perspectives. In T. McMorris: Elsevier; 2016.	2016							1
Peters B.GThe Meta?Governance of Policy Networks: Steering at a Distance, but still Steering’; . Working paper 78/2007); 2006, Madrid : Universidad Autónoma de Madrid.	2006							1
Pettee Gabriel KK, DiGioacchino DeBate R, High RR, Racine EF. Girls on the Run: A Quasi-Experimental Evaluation of a Developmentally Focused Youth Sport Program. Journal of Physical Activity and Health, 2011, 8(Suppl 2), S285 -S294.	2011	Evaluation
PHARE Project Report ￼Food and health research needs in Europe: thematic expert report http://www2.spi.pt/fahre/docs/fahre_draft_synthesis_of_research_needs_270111_merged.pdf	2010							1
Physical Activity Guidelines Advisory Committee (PAGAC). Physical Activity Guidelines Advisory Committee Report, 2008. Washington, DC, US Department of Health and Human Services, 2008.	2008	Guidance
Piątkowska M, Ružbarská I: The evolution of physical activity guidelines. Balt J Health Phys Act 2011, 3(4): 299-310. doi: 10.2478/v10131-011-0030-4.	2011	Evaluation	1
Plotnikoff R C.; Trinh L., Protection Motivation Theory: Is This a Worthwhile Theory for Physical Activity Promotion? Exercise & Sport Sciences Reviews. 38(2):91-98, April 2010.	2010	Theory Article
Policy paper on urban strategic planning: Local leaders preparing for the future of our cities Includes regional reports and case studies. United Cities of Local Governments. 2010.http://www.cities-localgovernments.org/upload/doc_publications/9636672792_(EN)_uclg_policy_paper_(eng)_web.pdf	2010	Plan
Popay, J (2006) Moving beyond effectiveness: Methodological issues in the synthesis of diverse sources of evidence: National Institute for Health and Clinical Excellence, London. (www.publichealth.nice.org.uk).	2006	Method			x
Pope C, Robert G, Bate P, le May A, Gabbay J: Lost in translation: a multi-level case study of the metamorphosis of meanings and action in public sector organizational innovation. Public Admin 2006, 84:59-79.	2010	Evaluation
Popkin B. The world is fat: the fads, trends, policies and products that are fattening the human race. Avery/Penguin, 2009	2009							1
Porter C, Ottawa to Bangkok: changing health promotion discourse . Health Promot. Int. (2007) 22(1): 72-79 first published online October 2, 2006 doi:10.1093/heapro/dal037	2007							1
Positive futures: a review of impact and good practice. Summary report. London, Sport England, 2002 (http://www.youth-justice-board.gov.uk/YouthJusticeBoard/Prevention/PositiveFutures). Projects de- signed to reduce crime and drug misuse and increase sport participation among 10- to 16-year-olds.	2002	Review
Potestio, M. L., Patel, A. B., Powell, C. D., McNeil, D. A., Jacobson, R. D., & McLaren, L. (2009). Is there an association between spatial access to parks/green space and childhood overweight/obesity in Calgary, Canada? International Journal of Behavioral Nutrition and Physical Activity, 6(77), 1–10.	2009	Evaluation			x	1
Potts-Datema, William; Smith, Becky J; Taras, Howard; Lewallen, Theresa C; et al. Successful strategies and lessons learned from development of large-scale partnerships of national non-governmental organisations. Global Health Promotion12. 3/4 (2005): 131-7.	2005	Evaluation
Potvin L, Haddad S, Frohlich K. Beyond process and outcome evaluation: a comprehensive approach for evaluating health promotion programs. In: Rootman I, Goodstadt M, Hyndman B, McQueen D, Potvin L, Springett J, (eds). Evaluation in Health Promotion: Principles and Perspectives. Copenhagen, Denmark: World Health Organization European Branch. 2001, 45–62. TROVA	2001	Method
Poucher J Buehler R., WALKING AND CYCLING FOR HEALTHY CITIES. Built Environment, Vol. 36, No. 4, December 2010, pp 391-414	2010	Other				1
Poucher J., Dijkstra L, Pomoting Safe Walking and Cycling to Improve Public Health: Lessons From The Netherlands and Germany. Am J Public Health. 2003 September; 93(9): 1509–1516. http://www.ncbi.nlm.nih.gov/pmc/articles/PMC1448001/?tool=pubmed	2003			WC				1
Poucher J., Infrastructure, Policies, and Programs to Promote Cycling," 4-minute interview of John Pucher for Active Living Research program of Robert Wood Foundation in San Diego California, August 23, 2010. Click here for video of talk. http://www.youtube.com/watch?v=74uwPmhEYRU	2010			WC				1
Powell LM, Slater S, Chaloupka FJ. The relationship between community physical activity settings and race, ethnicity and socioeconomic status. Evidence-Based Prev Med. 2004;1: 135–144.	2004	Evaluation		WC
Power, T.G., Ullrich-French, S.C., Steele, M.M., Daratha, K.B., Bindler, R.C,.Obesity, cardiovascular fitness, and physically active adolescents' motivations for activity: A self-determination theory approach, 2011; Psychology of Sport and Exercise 12 (6), pp. 593-598	2011	Theory Article
Pratt M, Ross C. Brownson, Luiz Roberto Ramos, Deborah Carvalho Malta, Hallal PC, Reis RS, Parra DC, Simões EJ, Project GUIA: A Model for Understanding and Promoting Physical Activity in Brazil and Latin America. Journal of Physical Activity and Health, 2010, 7(Suppl 2), S131-S134.	2010				x			1
Premier’s Physical Activity Taskforce on behalf of the Evaluation and Monitoring Working Group. Perth, Western Australia Government, 2003. )	2003	Method			x
PriestN, Armstrong R, Doyle J, Waters E. Interventions implemented through sporting organisations for increasing participation in sport. Cochrane Database Syst Rev. 2005 Apr 18;(2):CD004812.doi: 10.1002/14651858.CD004812.pub3.	2005	Review
Princen S, Agenda-setting in the European Union. Basingstoke, UK: Macmillan, Palgrave; 2009.	2009	Evaluation	1
Pronyk PMa Muniz M, Nemser B; Somers MA,, et al. The effect of an integrated multi-sector model for achieving the Millennium Development Goals and improving child survival in rural sub-Saharan Africa: a non- randomised controlled assessment.The Lancet 379 (9827) May 8, 2012, DOI:10.1016/S0140-6736(12)60207-4 http://www.millenniumvillages.org/uploads/ReportPaper/Millennium-Villages-child-mortality…	2012							1
Public Health Institute. Is physical activity by itself the answer?. In: California’s obesity crisis. Focus on solutions: what schools can do. Policy brief 4. Oakland CA: Public Health Institute; 2004. Available at: www.phi.org	2004							1
Public Health Law and Policy. Opening school grounds to the community after hours: A toolkit for increasing physical activity through joint use agreements. 2010. Available at: www.phlpnet.org/healthy-planning/ products/joint_use_toolkit. Accessed June 10, 2011.	2010							1
Pucher J, Buehler R, Merom D, Bauman A,2011) Walking and Cycling in the United States, 2001–2009: Evidence From the National Household Travel Surveys. American Journal of Public Health 101:S1, S310-S317	2011	Evaluation		WC
Pucher J, Buehler R, Cycling for everyone: Lessons from Europe," Transportation Research Record: Journal of the Transportation Research Board, No. 2074, November 2008, pp. 58-65.	2008			WC				1
Pucher J, Dill J, Handy S. Infrastructure, programs and policies to increase bicycling: an international review. Prev Med. 2010;50(suppl 1):S106–125.	2010	Review		WC
Pucher J,Dijkstra L, Promoting Safe Walking and Cycling to Improve Public Health: Lessons From The Netherlands and Germany. Am J Public Health. 2003;93:1509–1516. http://www.ncbi.nlm.nih.gov/pmc/articles/PMC1448001/pdf/0931509.pdf	2003			WC				1
Pucher J., Buehler R., Cycling to Work in 90 Large American Cities: New Evidence on the Role of Bike Paths and Lanes," Transportation, Vol. 38, 2011.	2011			C				1
Pucher J., Buehler R.,(2008) 'Making Cycling Irresistible: Lessons from The Netherlands, Denmark and Germany', Transport Reviews, Vol 28, 2008 http://bikeportland.org/wp-content/uploads/2007/11/pucherbuehlermakingcyclingirresistible.pdf	2008			WC				1
Puska P., Successful prevention of non-communicable diseases: 25 year experiences with North Karelia Project in Finland Public Health Medicine 2002; 4(1):5-7	2002	Evaluation
Quigg R, Assessing the effect of up-grading playgrounds on children’s physical activity http://otago.ourarchive.ac.nz/handle/10523/447	2008	Evaluation		WC
Raab P C, Bellamy, C. (2005). Joined-up government and privacy in the United Kingdom: managing tensions between data protection and social policy. Part I. Public Administration, 83(1), 111-133. doi:10.1111/j.0033-3298.2005.00440.x	2005	Theory Article
Raeburn J, Akerman M, Chuengsatiansup K Mejia F, Oladepo O, Community capacity building and health promotion in a globalized world.Health Promot. Int. (2006) 21(suppl 1): 84-90 doi:10.1093/heapro/dal055	2006							1
Raine K. Overweight and obesity in Canada: a population health perspective. Ottawa, Canadian Institute for Health Information, 2004.	2006							1
Raja S, Ball M, Booth J, Haberstro P, Veith K. Leveraging neighborhood-scale change for policy and program reform in Buffalo, New York. Am J Prev Med. 2009 Dec;37(6 Suppl 2):S352-60	2004							1
Ralph J. DiClemente, Richard A. Crosby, Michelle C. Kegler. Emerging Theories in Health Promotion Practice and Research John Wiley & Sons, 02/nov/2009 - 624 pagine	2009	Theory Article
Ramanathan S, Allison K. R., Faulkner G, Dwyer J. M. (2010), Challenges in assessing the implementation and effectiveness of physical activity and nutrition policy interventions as natural experiments, Health Promotion International, 23(3):290-297.	2009	Method
Rayner G, Hawkes C, Lang T, Bello W.Trade liberalization and the diet transition: a public health response. Health Promot. Int. (2006) 21(suppl 1): 67-74 doi:10.1093/heapro/dal053	2010							1
Rayner J, Howlett M, Introduction: Understanding integrated policy strategies and their evolution , Policy and Society, Volume 28, Issue 2, July 2009, Pages 99-109.	2009	Theory Article
Rees R, Harden A, Shepherd J, Brunton G, Oliver S, Oakley A (2001) Young people and physical activity: a systematic review of research on barriers and facilitators. London: EPPI-Centre, Social Science Research Unit, Institute of Education, University of London.	2001	Systematic Review
Rees R, Kavanagh J, Harden A, Shepherd J, Brunton G, Oliver S, Oakle A, Young people and physical activity: a systematic review matching their views to effective interventions, Health Educ. Res. (2006) 21 (6): 806-825***. http://her.oxfordjournals.org/content/early/2006/10/13/her.cyl120	2006	Systematic Review
Reger-Nash B; Bauman A, Cooper L, Chey, Ti; Simon, K J., Evaluating communitywide walking interventions. Evaluation and Program Planning Volume: 29, Issue: 3, August, 2006, pp. 251-259	2006	Evaluation		W
Reger-Nash, B., Cooper, L., Smith, H., Mannarino, D., Edgman, K, Holmstrand, L., et al. (2002). Training manual for a media-based community campaign promoting walking based on wheeling walks.	2009			W	x			1
Reger-Nash, B., Fell, P., Spicer, D., Fisher, B., Cooper, L., Bauman, A., et al. (2006). BC walks: The replication of a communitywide mass media campaign. Preventing Chronic Disease, 3(3). Available at url: http://www.cdc.gov/pcd/issues/2006/jul/05_0138.htm.	2006	Evaluation		W
Reger-Nash, B., Smith, H., Cooper, L., & Holmstrand, L. (2003). Community health participatory planning process manual. Available at URL: http://www.hsc.wvu.edu/som/cmed/wreger/training/training_manuals.asp.	2002			W				1
Reilly JJ, McDowell ZC. Physical activity interventions in the prevention and treatment of paediatric obesity: systematic review and critical appraisal. Proc Nutr Soc. 2003;62:611–619.	2003	Systematic Review
Renger R, Steinfelt V, Lazarus S., Assessing the effectiveness of a community-based media campaign targeting physical inactivity. Fam Community Health, 2002;25(3):18-30	2002	Evaluation
Richards R, Murdoch L, Reeder AI, Rosenby M. Advocacy for active transport: advocate and city council perspectives.Int J Behav Nutr Phys Act. 2010 Jan 24;7:5. http://www.ncbi.nlm.nih.gov/pmc/articles/PMC2830166/?tool=pubmed	2010	Theory Article		WC
Riley BL,MacDonald J, Mansi O, Kothari A, Kurtz D, vonTettenborn LI, Edwards NC, Is reporting on interventions a weak link in understanding how and why they work? A preliminary exploration using community heart health exemplars. Implementation Science 2008, 3:27 doi:10.1186/1748-5908-3-27	2008							1
Riva M, Gauvin L, Richard L, Use of local area facilities for involvement in physical activity in Canada: insights for developing environmental and policy interventions Health Promot. Int. (2007) 22(3): 227-235 first published online June 15, 2007 doi:10.1093/heapro/dam015	2007					1		1
Robert Wood Johnson Foundation_RWJF, Promoting Physical Activity through the Shared Use of School and Community Recreational Resources, San Diego Califronia April 2012 http://www.activelivingresearch.org/files/ALR_Brief_SharedUse_April2012.pdf	2012							1
Robertson A et al. Food and health in Europe: a new basis for action. Copenhagen, WHO Regional Office for Europe, 2004 (http://www.euro.who.int/document/E82161.pdf, accessed 14 May 2007)	2007							1
Robinson L, A summary of Diffusion of Innovations 2009 http://www.enablingchange.com.au/Summary_Diffusion_Theory.pdf	2009	Theory Article
Robinson TN. Reducing children’s television viewing to prevent obesity: a ran- domized controlled trial. JAMA. 1999;282(16):1561-1567.	2009							1
Rocco C. Il pinao urbano di mobilità sostenibile -Sezione B Un sistema di indicatori, Osservatorio Città Soctenibili - Transport Dipartimento intervuniv Territorio Università Politecnico di Torino, 2010 http://www.ocs.polito.it/casi/dwd/pianourb_2.pdf	1999							1
Rodriguez D. Active Transportation: Making the Link from Transportation to Physical Activity and Obesity. A Research Brief. Princeton, NJ: Active Living Research, a National Program of the Robert Wood Johnson Foundation; Summer 2009. Available from: www.activelivingresearch.org.	2010							1
Rogers A, Vassilev I, Sanders C, Susan Kirk, Carolyn Chew-Graham, Anne Kennedy, Joanne Protheroe, Peter Bower, Blickem C, Reeves D, Kapadia D., Brooks H, Fullwood D, Richardson G, Social networks, work and network-based resources for the management of long-term conditions: a framework and study protocol for developing self-care support. Implementation Science 2011, 6:56 (29 May 2011) http://www.i…	2011	Systematic Review			x
RØISELAND, A. (2011). Understanding local governance: INSTITUTIONAL FORMS OF COLLABORATION. Public Administration, 89(3), 879-893.doi:10.1111/j.1467-9299.2010.01887.x	2009	Theory Article
Rossi G., Moretti R., Pirone M, Locatelli W., Lotta alla sedentarietà: a scuola con il Piedibus. Epidemiol Prev 2004; 28 (6): 346-49. www.piedibus.it/upl/biblioteca/1116342020_piedibus%20epidemiologia%20%20e%20prevenzione.pdf	2011							1
Roussos ST, Fawcett SB.,A review of collaborative partnerships as a strategy for improving community health.Annu Rev Public Health. 2000;21:369-402	2000	Systematic Review			x
Roux L, Pratt M, Tengs TA, Yore MM, Yanagawa TL, Van Den Bos J, Rutt C, Brownson RC, Powell KE, Heath G, Kohl HW, Teutsch S, Cawley J, Min Lee I, West L,. Buchner DM, Cost Effectiveness of Community-Based Physical Activity Interventions, American Journal of Preventive Medicine Volume 35, Issue 6 , Pages 578-588, December 2008. http://www.ajpmonline.org/article/S0749-3797(08)00770-8/fulltext	2008	Evaluation
RTD Report. VicHealth Metro ACTIVE evaluation. Participation and equity for health.Final report March, Australia 2008 www.vichealth.vic.gov.au	2008	Evaluation		WC
Rütten A, Abel T, Kannas L, von Lengerke T, Lüschen G, Rodríguez Diaz JA, Ståhl T, Vinck J, van der Zee J, Bernasconi PZ. Health promotion by sports and physical activity: politics, behavior and infrastructures in a European comparison. Soz Praventivmed. 2001;46(1):29-40. Recup	2008							1
Rütten A, Abu-Omar, K, Gelius, P, Dinan-Young, S, Frändin K, Hopman-Rock, M et al: Policy assessment and policy development for physical activity promotion: results of an exploratory intervention study in 15 European Nations. Health Res Policy Syst 2012, 10:14. doi: 10.1186/1478-4505-10-14	2012	Evaluation	1
Rutter H et al. Health economic assessment tool for cycling (HEAT for cycling): user guide. Copenhagen, WHO Regional Office for Europe, 2007 (http://euro.who.int/transport/policy/20070503_1). This tool estimates the economic savings resulting from reduced mortality dies to cycling, determining the economic value of declining mortality if x people cycle y distance on most days.	2007	Evaluation			x
Rychetnik L, Frommer M, Hawe P, et al. Criteria for evaluating evidence on public health interventions. J Epidemiol Community Health 2002;56:119–27.	2002	Theory Article
Rychetnik, L., Bauman, A., Laws, R., King, L., Rissel, C., Nutbeam, D., et Al. (2012). Translating research for evidence-based public health: Key concepts and future directions. Journal of Epidemiology & Community Health. Advance online publication. doi:10.1136/jech-2011-200038	2012	Theory Article
Rycroft-Malone J, Harvey G, Kitson A, McCormack B, Seers K, Titchen, A: Getting evidence into practice: ingredients for change. Nurs Stand 2002,16: 38-43.	2002							1
Rycroft-Malone J, McCormack B, Hutchinson, AM, DeCorby K, Bucknall TK, Kent B et al: Realist synthesis: illustrating the method for implementation research Implement Sci 2012, 7:33. doi: 10.1186/1748-5908-7-33	2012	Method
Rycrofte-Malone J, Wilkinson JE, Burton CR et al. Implementing health research through academic and clinical partnerships: a realistic evaluation of the Collaborations for Leadership in Applied Health Research and Care (CLAHRC). Implementation Science 2011, 6:74. http://www.implementationscience.com/content/6/1/74	2011	Evaluation
Saelens BE, Sallis JF, Black JB, Chen D. Neighborhood-based differences in physical activity: an environment scale evaluation. Am J Public Health. 2003;93:1552–1558	2003	Evaluation				1
Saelens BE, Sallis JF, Frank LD. Environmental correlates of walking and cycling: findings from the transportation, urban design, and planning literatures. Ann Behav Med. 2003;25:80–91	2003	Evaluation		WC		1
SaelensBE, Handy SL, Built Environment Correlates of Walking: A ReviewMed Sci Sports Exerc. 2008 July ; 40(7 Suppl): S550–S566. doi:10.1249/MSS.0b013e31817c67a4.	2008				x	1		1
Safron, M., Cislak, A., Gaspar, T., Luszczynska, A., Effects of school-based interventions targeting obesity-related behaviors and body weight change: A systematic umbrella review. Health and Place 2010;16 (6): 1124-1128.	2010	Systematic Review
Sallis J F, Lawrence D. Frank b, Brian E. Saelens c, M. Katherine KraftActive transportation and physical activity: opportunities for collaboration on transportation and public health research. Transportation Research Part A 38 (2004) 249–268. http://contextsensitivesolutions.org/content/reading/active-transportation-physical-activity/resources/active-transportation-physical-activity/	2008	Theory Article
Sallis JF, Cervero RB, Ascher W, Henderson KA, Kraft MK, Kerr J, AN ECOLOGICAL APPROACH TO CREATING ACTIVE LIVING COMMUNITIES. Annu. Rev. Public Health 2006. 27:297–322	2006	Theory Article				1
Sallis JF, Bauman A, Pratt M. 1998. Environmental and policy interventions to promote physical activity. Am. J. Prev. Med. 15:379–97	1998	Other				1
Sallis JF, Myron FF, Rodríguez DA, Saelens BE: Role of built environments in physical activity, obesity and cardiovascular disease. Circulation. 2012, 125(5):729-737. doi: 10.1161/CIRCULATIONAHA.110.969022.	2012	Method				1
Sallis JF, Prochaska JJ, Taylor WA. A review of correlates of physical activity of children and adolescents. Med Sci Sports Exerc. 2000;32:963–975	2000	Review
Sallis JF, Story M, Lou D. Study designs and analytic strategies for environmental and policy research on obesity physical activity, and diet: recommendations from a meeting of experts. Am J Prev Med. 2009;36(2,Suppl):S72–S77.	2009	Theory Article				1
Sallis, J. F. and Glanz, K., 2006, The role of the built environment in physical activity, eating, and obesity in childhood. Future of Children, Vol. 16, 89–108.	2006	Theory Article				1
Sallis, J. F., 2008, Angels in the details: Comment on “The Relationship Between Destination Proximity, Destination Mix, and Physical Activity Behaviors.” Preventive Medicine, Vol. 46(1): 6–7.	2008					1		1
Sallis, J., Cervero, R., Ascher, W., Henderson, K., Kraft, M.K., Kerr, J. (2006). An ecologic approach to creating active living communities. Annual Review of Public Health, 27, 297-322. http://www.annualreviews.org/doi/pdf/10.1146/annurev.publhealth.27.021405.102100	2006	Theory Article				1
Salmon J., Novel strategies to promote children's physical activities and reduce sedentary behavior. J Phys Act Health. 2010 Nov;7 Suppl 3:S299-306. http://heapro.oxfordjournals.org/content/22/4/307.long	2006							1
Sam, M. P. (2009). The Public Management of Sport. Public Management Review, 11(4), 499-514. doi:10.1080/14719030902989565	2010							1
Samuels SE, DrP.H., rampo L, Boyle M, Crawford, Patricia B,DrP.H., R.D., Yancey A, Flores G. The california endowments healthy eating, active communities program: A midpoint review. Am J Public Health. 2010;100(11):2114-23.	2011							1
Sanchez-Vaznaugh, EV, Sánchez, BN, Rosas, LG, Baek, J, Egerter, S: Physical education policy compliance and children's physical fitness Am J Prev Med 2012, 42:452-459. doi: 10.1016/j.amepre.2012.01.008.	2012	Evaluation	1
Sandosham S, Winder D, Building Multi-Sectoral Partnerships To Address Complex Problems. Lessons from the Partnership for Child Nutrition and the Bhavishya Alliance, Synergos November 2008 India http://www.synergos.org/knowledge/abstracts/08/pcnindialessons.htm	2008	Evaluation
Sandoval A, Turner L, Nicholson L, Chriqui J, Tortorelli M, Chaloupka FJ. The relationship among state laws, district policies, and elementary school-based measurement of children's body mass index. J Sch Health. 2012 May;82(5):239-245.	20012	Evaluation
Sandy Whitelaw, Nicola Graham, David Black, Jonathan Coburn, and Lorna Renwick . Developing capacity and achieving sustainable implementation in healthy ‘settings’: insights from NHS Health Scotland's Health Promoting Health Service project. Health Promot. Int. (2012) 27(1): 127-137 first published online June 16, 2011 doi:10.1093/heapro/dar038	2012							1
Schasberger MG, Hussa CS, Polgar MF, McMonagle JA, Burke SJ, Gegaris AJ. Promoting and developing a trail network across suburban, rural, and urban communities. Am J Prev Med 2009;37(6S2):S336–S344.	2009							1
Schilling JM, Giles-Corti B, Sallis JF. Connecting active living research and public policy: transdisciplinary research and policy interventions to increase physical activity. J Public Health Policy. 2009;30(Suppl 1):S1–S15.	2009							1
Sarmiento OL, Rios AP, Paez DC, Quijano K, Fermino RC.The Recreovía of Bogotá, a Community-Based Physical Activity Program to Promote Physical Activity among Women: Baseline Results of the Natural Experiment Al Ritmo de las Comunidades. Int J Environ Res Public Health. 2017 Jun 13;14(6). pii: E633. doi: 10.3390/ijerph14060633.	2017	Other				1
Schmid TL, Pratt M, Witmer L. A framework for physical activity policy research. J Phys Act Health.2006;3(S1):S20–S29.	2006	Theory Article
Schöppe S, Bauman A, Bull F, International Review of National Physical Activity Policy: A literature review. NSW Centre for Physical Activity and Health, June 2004, Report n. CPAH04-0002 [http://www.cpah.health.usyd.edu.au/pdfs/2004_PA_Policy.pdf]	2004	Systematic Review
Scott DS, Albrecht L, O'Leary K, Geoff DC Ball, Donna M Dryden, Hartling L, Hofmeyer A, C Jones, Kovac Burns K, Newton AS, Thompson D, Klassen TP, A protocol for a systematic review of knowledge translation strategies in the allied health professions. Implementation Science 2011, 6:58 (2 June 2011)	2011	Systematic Review					1
Seers K, Cox K, Crichton NJ, Edwards RT, Eldh AC, Estabrooks CA, Harvey G, Hawkes C, Kitson A, Linck P, McCarthy G, McCormack B, Mockford C, Rycroft-Malone J, Titchen A, Wallin L. FIRE (Facilitating Implementation of Research Evidence): a study protocol.Implement Sci. 2012 Mar 27;7:25.	2006							1
Seguin, B., Parent, M., and O’Reilly, N. (2010). “Corporate Support: A Corporate Social Responsibility Alternative to traditional Event Sponsorship”, International Journal of Sport Management and Marketing, 7(3/4), 202-222.	2010							1
Seixas, C. Simão, and F. Berkes. (2009). Community-based enterprises: The significance of partnerships and institutional linkages. Community-based enterprises: The significance of partnerships and institutional linkages. International Journal of the Commons 4(1):183-212.Retrieved from http://www.thecommonsjournal.org/index.php/ijc/article/view/133/97	2009	Theory Article
Shai I, Erlich D, Cohen AD, et al. The effect of personal lifestyle intervention among health care providers on their patients and clinics; the Promoting Health by Self Experience (PHASE) randomized controlled intervention trial. Prev Med. 2012 Oct;55(4):285-91. doi: 10.1016/j.ypmed.2012.08.001. Epub 2012 Aug 12. (Original) PMID: 22906808	2012							1
Shannon D Scott, Lauren Albrecht, Kathy O'Leary, Geoff DC Ball, Donna M Dryden, Lisa Hartling, Anne Hofmeyer, C Jones, Kathy Kovac Burns, Amanda S Newton, David Thompson, Terry P Klassen, A protocol for a systematic review of knowledge translation strategies in the allied health professions. Implementation Science 2011, 6:58.	2011	Systematic Review					1
Sharpe EK, Forrester S,Mandigo J, Engaging Community Providers to Create More Active After-School Environments: Results From the Ontario CATCH Kids Club Implementation Project , Journal of Physical Activity and Health, 2011, 8(Suppl 1), S26-S31	2012	Evaluation				1
Sharpe PA (2003) Community-based physical activity intervention. Arthritis and Rheumatism 49: 455-462.	2003	Other
Shephard RJ, Lankenau B, Pratt M, Neiman A, Puska P, Benaziza H, Bauman A (2004) Physical activity policy development: a synopsis of the WHO/CDC consultation, September 29 through October 2, 2002, Atlanta, Georgia. Public Health Rep (serial on the Internet) 119 (3):346–351. Available from: http://www. publichealthreports.org/issuecontents.cfm?Volume=119&Issue=3 Cited 5 Jan 2006	2002	Other
Shilton T, Bauman A, Bull F, Sarmiento O, Effectiveness and Challenges for Promoting Physical Activity Globally. Global Perspectives on Health Promotion Effectiveness 2007, Section 2, 87-106, DOI: 10.1007/978-0-387-70974-1_7. http://www.springerlink.com/content/j523206641j55436/	2007	Theory Article
Shilton T: Advocacy for physical activity - from evidence to influence. Promot Educ2006, 13:118-126.	2006	Theory Article	1
Siefken K, Rona Macniven, Grant Schofield, Bauman A, Waqanivalu T, A stocktake of physical activity programs in the Pacific Islands . Health Promot. Int. (2012) 27(2): 197-207 first published online May 11, 2011 doi:10.1093/heapro/dar026	2011							1
Siega-Riz AM, El Ghormli L, Connie Mobley, Bonnie Gillis, Diane Stadler, Hartstein J, Volpe SL, Amy Virus, Bridgman J,The effects of the HEALTHY study intervention on middle school student dietary intakes. Int J Behav Nutr Phys Act. 2011; 8: 7.	2011	Evaluation
Siegal G, Siegal N, Bonnie RJ. An account of collective actions in public health. Am J Public Health. 2009;99(9):1583–1587. [PMC free article] [PubMed]	2009	Theory Article
Simoes, E. J., Hallal, P., Pratt, M., Ramos, L., Munk, M., Damascena, W., & ... Brownson, R. C. (2009). Effects of a Community-Based, Professionally Supervised Intervention on Physical Activity Levels Among Residents of Recife, Brazil. American Journal Of Public Health, 99(1), 68-75. doi:10.2105/AJPH.2008.141 978	2012							1
Singh A., Uijtdewilligen L, Twisk JWR., Physical Activity and Performance at School. Arch Pediatr Adolesc Med. 2012;166(1):49-55.	2012				x			1
Sloman L, Cavill N, Cope A, Muller L, Kennedy A. Analysis and synthesis of evidence on the effects of investment in six cycling demonstration towns. Department for Transport and Cycling England, 2009.	2009	Evaluation
Smith AL, S Biddle Youth physical activity and sedentary behavior: challenges and solutions Youth physical activity and sedentary behavior challenges and solutions, The Sport Psychologist (2008) Pages: 59-78.	2008							1
Smolders M, Laurant M, Verhaak P, Prins M, et al. (2010). Which physician and practice characteristics are associated with adherence to evidence-based guidelines for depressive and anxiety disorders? Medical Care 48(3):240-8.	2010							1
Sørensen E.; Torfing J.Making Governance Networks Effective and Democratic through Metagovernance’; Public Administration); 2009 Vol. 87, p234-258, 25p	2009							1
Southern , Partnerships as a Form of Local Governance. Local Government studies, 2002 vol.28(2), 16-32. DOI:10.1080/714004146	2002							1
Sowden S, Raine R: Running along parallel lines: how political reality impedes the evaluation of public health interventions. A case study of exercise referral schemes in England. J Epidimiol Community Health 2008, 62:835-841. doi: 10.1136/jech.2007.069781.	2008	Evaluation	1
Spellers V, Evaluation of health promotion, public health or public policy interventions.Principles and Practice of Health Promotion: Health Promotion Evalution and Effectiveness. 2007. http://www.healthknowledge.org.uk/public-health-textbook/disease-causation-diagnostic/2h-principles-health-promotion/health-promotion-evaluation	2007	Evaluation
Spence JC, Le REe,Toward a comprehensive model of physical activity Psychology of Sport and Exercise 4 (2003) 7–24.	2003	Theory Article
Spengler JO, Connaughton DP, Maddock Je. Liability concerns and access to school recreational facilities in underserved communities. Am J Prev Med. 2011; 41: 415–420.	2011							1
Spengler JO, Young SJ, Linton LS. Schools as a community resource for physical activity: legal considerations for decision makers. Am J Health Promot. 2006; 21: 390–396.	2006	Theory Article
Sport England. Framework for Sport in England – Making England an active and successful sporting nation: A vision for 2020. London: Sport England; 2004.	2004	Theory Article
Spoth RL, Greenberg MT.,Toward a comprehensive strategy for effective practitioner-scientist partnerships and larger-scale community health and well-being. Am J Community Psychol. 2005 Jun;35(3-4):107-26. http://www.ncbi.nlm.nih.gov/pmc/articles/PMC2848444/?tool=pubmed	2005							1
Spruijt-Metz, D. Etiology, treatment, and prevention of obesity in childhood and adolescence: A decade in review.2011; Journal of Research on Adolescence 21 (1), pp. 129-152.	2011	Systematic Review
Sridharan S, Campbell B, Zinzow H: Developing a Stakeholder-Driver Anticipated Timeline of Impact for Evaluation of Social Programs. American Journal of Evaluation 2006, 27(2):148-162. Publisher Full Text	2006	Evaluation
Ståhl, T, Rütten, A, Nutbeam, D, Kannas, L. (2002) The importance of policy orientation and environment on physical activity activation – a comparative analysis between Eastern Germany, Western Germany and Finland. Health Promotion International, 17 (3), 235-246. http://heapro.oxfordjournals.org/content/17/3/235.long	2005					1		1
Stame N: Theory-based evaluation and types of complexity. Evaluation, 2004, 10, 58-76. doi: 10.1177/1356389004043135	2004	Method
Stead D, Institutional aspects of integrating transport, environment and health policies, Transport Policy, Volume 15, Issue 3, May 2008, Pages 139-148.	2002	Theory Article			x	1
STEIJN B, ERIK-HANS KLIJN and JURIAN EDELENBOSPUBLIC PRIVATE PARTNERSHIPS: ADDED VALUE BY ORGANIZATIONAL FORM OR MANAGEMENT? Public Administration , 2011 Volume 89, Issue 4 (pages 1235–1252)Article first published online: 7 MAR 2011 | DOI: 10.1111/j.1467-9299.2010.01877.x	2008							1
Stokols D., Translating social ecological theory into guidelines for community health promotion. Am J Health Promot. 1996 Mar-Apr;10(4):282-98. Best A, Stokols D, Green LW, Leischow S, Holmes B, Buchholz K., An integrative framework for community partnering to translate theory into effective health promotion strategy. Am J Health Promot. 2003 Nov-Dec;18(2):168-76. http://www.ncbi.nlm.nih.gov/pubm…	1996	Theory Article
Storm I, Marie-Jeanne Aarts, Janneke Harting, Albertine J. Schuit, Opportunities to reduce health inequalities by ‘Health in All Policies’ in the Netherlands: An explorative study on the national level.Health Policy, Volume 103, Issues 2–3, December 2011, Pages 130-140.	2011							1
Strong , W B, Robert M. Malina, Cameron J.R. Blimkie, Stephen R. Daniels, Rodney K. Dishman, Bernard Gutin, Albert C. Hergenroeder, Aviva Must, Patricia A. Nixon, James M. Pivarnik, Thomas Rowland, Stewart Trost, François Trudeau Evidence Based Physical Activity for School-age Youth, The Journal of Pediatrics Volume 146, Issue 6 , Pages 732-737, June 2005	2005							1
Sturm R. The economics of physical activity: societal trends and rationales for interventions. Am J Prev Med. 2004 Oct;27(3 Suppl):126-35.	2004	Theory Article
SugarmanSD, Sandman N, Using performance-based regulation to reduce childhood obesity, Australia and New Zealand Health Policy 2008, 5:26. http://www.anzhealthpolicy.com/content/5/1/26	2008							1
Sullivan H, Barnes M, Matka E, Building collaborative capacity through 'theories of change'. Early lessons from the evaluation of health action zones in England. Evaluation 2002, 8(2):205-226. Publisher Full Text	2002	Evaluation
Suminski RR, Poston WS, Petosa RL, Stevens E, Katzenmoyer LM, Features of the neighborhood environment and walking by U.S. adults. American Journal of Preventive Medicine Volume: 28, Issue: 2, February, 2005, pp. 149-155	2005					1		1
Sustrans. Lancashire TravelSmart Programme. Interim evaluation of stage 2.1 (Torrisholme). Report for Lancashire County Council. Socialdata, Sustrans, 2007.	2007	Evaluation		WC	x
Swainston K, Summerbell C, The effectiveness of community engagement approaches and methods for health promotion interventions.Rapid Review Phase 3, NICE National Collaborating Centre University of Teesside. Jen 2008 http://www.nice.org.uk/nicemedia/pdf/HealthPromotionEvidenceReviewFinal.pdfSwainston	2005	Review
Taber DR, Chriqui JF and Chaloupka FJ: Association and diffusion of nutrition and physical activity policies on the state and district level. The Journal of School Health 2012, 82:201-209. doi: 10.1111/j.1746-1561.2012.00688.x.	2012	Evaluation	1
Taber DR, Chriqui JF, Chaloupka FJ.Association and diffusion of nutrition and physical activity policies on the state and district level. J Sch Health. 2012 May;82(5):201-209.	2012							1
Task Force on Community Preventive Services. Increasing physical activity: a report on recommendations from the Task Force on Community Preventive Services. MMWR. 2001;50(RR18):1–16. Available at: http://www.cdc.gov/mmwr/preview/mmwrhtml/rr5018a1.htm.	2001	Guidance
Task Force on Community Preventive Services. Physical activity.In :Zaza S, Briss PA, Harris KW, eds. The Guide to Community Preventive Services: What Works to Promote Health? Atlanta (GA): Oxford University Press;2005:80-113.	2005	Guidance
Task Force on Community Preventive Services. Recommendations to increase physical activity in communities. Am J Prev Med 2002;22 (4S):67-72.	2002	Guidance
Task Force on Community Preventive Services. Recommendations to increase physical activity in communities. Am J Prev Med. 2002;22(4 Suppl):67–72. Available at: http://www.thecommunityguide.org/pa/pa-ajpm-recs.pdf.	2002	Guidance
Task Force on Community Preventive Services. The Guide to Community Preventive Services: What Works to Promote Health? New York, NY: Oxford University Press; 2005:94–96. Available at: http://www.thecommunityguide.org/library/book (Chapter 2: Physical Activity).	2005	Guidance
TenBrink DS, McMunn R, Panken S. Project U-Turn: increasing active transportation in Jackson, Michigan. Am J Prev Med 2009;37(6S2): S329 –S335.	2009							1
Thomas IM, Sayers SP, Godon JL, Reilly SR. Bike, walk, and wheel: a way of life in Columbia, Missouri. Am J Prev Med 2009;37(6S2):S322–S328.	2009							1
Thommen O, Braun Ch (2004) Effectiveness of transport interventions to promote Human Powered Mobility (HPM) or daily physical activity. Intermediate Report. Institute of Social and Preventive Medicine of the University of Basle, October 2003. In: Martin B, Martin-Diener E,…	2004	Evaluation
Thomson H. A dose of realism for healthy urban policy: lessons from area based initiatives in the UK. Journal of Epidemiology & Community Health 2008; 62:932-36.	2008							1
Timmons BW. Factors associated with physical activity in early childhood. Ottawa, Canadian Society for Exercise Physiology, 2005 (http://www.csep.ca/pdfs/Timmons_earlychildhoodPA.pdf). A review of the determinants of physical activity among children 0–5 years old.	2005							1
Timperio, A., Ball, K., Salmon, J., Roberts, R. and Crawford, D., 2007, Is availability of public open space equitable across areas? Health and Place, Vol. 13, 335–340.	2007							1
Tirilis T, Husson H, Kara DeCorby, Dobbins M. Missing and accounted for: gaps and areas of wealth in the public health review literature. BMC Public Health. 2011; 11: 757. Published online 2011 October 3. doi: 10.1186/1471-2458-11-757	2011							1
Tolley R, Sustainable Transport - Planning for Walking and Cycling in Urban Environments, 2003 Woodhead Publishing transport infrastructure. World Transport Policy Pract.. 2003;9:6–17. www.knovel.com/web/portal/browse/display?_EXT_KNOVEL_DISPLAY_bookid=2309	2003	Other				1
Transportation Research Board TRB, National Cooperative Highway Research Program NCHRP report 552 Guidelines analysis of Investments in Bicycle facilities, National Cooperative Highway research Program. 2006 http://www.nap.edu/catalog/13929/guidelines-for-analysis-of-investments-in-bicycle-facilities	2006	Method		WC
Transportation Research Board, Does the built environment influence physical activity? Examining the evidence. Washington, DC, TRB Special report 282; 2005. [last accessed 22 May 2016]	2005	Review		WC		1
Tripodi A, Severi S, Midili S, Corradini B.Community projects" in Modena (Italy): promote regular physical activity and healthy nutrition habits since childhood.Int J Pediatr Obes. 2011 Oct;6 Suppl 2:54-6.	2011							1
Trouton A, Kavanagh J, Oakley A, Harden A, Powell, C (2005) A summary of ongoing activity in the use of incentive schemes to encourage positive behaviours in young people. London: EPPI-Centre, Social Science Research Unit, Institute of Education, University of London http://eppi.ioe.ac.uk/cms/LinkClick.aspx?fileticket=gU07Ast4W4U%3d&tabid=249&mid=1370	2005	Systematic Review
Tudor-Locke C, Ainsworth BE, Popkin BM. Active commuting to school: an overlooked source of childrens' physical activity? Sports Med. 2001;31(5):309-13.	2001	Evaluation
Turku, Active living in Turku: promoting health by means of physical activity. Turku, City of Turku, 2006 http://www.marebalticum.org/balticoffice/images/stories/active_living/turkubook.pdf	2006				x			1
Turrinji A, Cristofoli D,Frosini F, Nasi G, NETWORKING LITERATURE ABOUT DETERMINANTS OF NETWORK EFFECTIVENESS, Public Administration Vol. 88, No. 2, 2010 (528–550)	2010			WC				1
U.S. Department of Health and Human Services. Promoting Physical Activity. A Guide for Community Action. Champaign,IL: Human Kinetics, 1999.	1999	Guidance
US Department of Health and Human Services. Physical Activity Evaluation Handbook. Atlanta, GA: US Department of Health and Human Services, Centers for Disease Control and Prevention; 2002.	2002	Evaluation
Van Acker R, De Bourdeaudhuij I, De Cocke K, Klesges LM, Cardon G, The impact of disseminating the whole-community project ‘10,000 Steps’: a RE-AIM analysis BMC Public Health 2011, 11:3	2011	Evaluation
Van Dick V, Cardon G, Deforche Band De Bourdeaudhuij I, Urban–Rural Differences in Physical Activity in Belgian Adults and the Importance of Psychosocial Factors. 2011, Volume 88, Number 1, 154-167.	2011							1
van Kleef E, Shimizu M, Wansink B, Food compensation: do exercise ads change food intake? Int J Behav Nutr Phys Act. 2011; 8: 6. Published online 2011 January 28. doi: 10.1186/1479-5868-8-6	2008							1
van Sluijs EM, McMinn AM, Griffin SJ. Effectiveness of interventions to promote physical activity in children and adolescents: systematic review of controlled trials. Br J Sports Med. 2008 Aug;42(8):653-7.	2011	Systematic Review
Veitch J, Kylie Ball, David Crawford, Gavin R. Abbott, Jo Salmon J., Park Improvements and Park Activity: A Natural Experiment Original Research Article. Am J Prev Med 2012;42(6):616–619.	2012	Evaluation				1
VicHealth Foundation, Understanding barriers to sport participation.Final Report Insights for key VicHealth target segments. Australia May 2010	2010							1
Vigor A, Mean M, Tims C. After the gold rush: a sustainable Olympics for London. London, Institute for Public Policy Research/Demos, 2004. (http://www.demos.co.uk/files/AftertheGoldRush.pdf)	2004							1
Vlahov, D., Agarwal, S. R., Buckley, R. M., Caiaffa, W. T., Corvalan, C. F., Ezeh, A. C. Watson, V. J. (2011). Roundtable on urban living environment research (RULER). Journal of Urban Health, 88(5), 793-857. doi:10.1007/s11524-011-9613-2	2011					1		1
Vuori I (2005) Experiences from the European network for the promotion of health- enhancing physical activity (European HEPA Network). In: Physical Activity Expert Meeting “Agita Europe”, Magglingen, Switzerland, 13.-15.06.2004. Meeting Report (report on the Internet). Swiss Federal Office of Sports, Magglingen, p 9. Available from: http://www.euro.who.int/ hepa/meetings/20050615_9 Cited 5 Jan 20…	2004							1
Vuori I, Lankenau B, Pratt M (2004) Physical activity policy and program development: the experience in Finland. Public Health Rep (serial on the Internet) 119:331–345. Available from: http://www. publichealthreports.org/issuecontents.cfm?Volume=119&Issue=3 Cited 5 Jan 2006	2004							1
Wakefield J, 2004 Fighting Obesity Through the Built Environment. Environ Health Perspect 112(11): doi:10.1289/ehp.112-a616	2004					1		1
Walfoort NL, Clark JJ, Bostock MJ, O’Neil K. ACTIVE Louisville: incorpo- rating active living principles into planning and design. Am J Prev Med 2009;37(6S2):S368 –S376.	2009							1
Wall M, Hayes R, Moore D, Petticrew M, Clow A, Schmidt E, Draper A, Lock K, Lynch R, Renton A. Evaluation of community level interventions to address social and structural determinants of health: a cluster randomised controlled trial. BMC Public Health. 2009 Jun 28;9:207.	2009	Evaluation
Wallerstein N (2006). What is the evidence on effectiveness of empowerment to improve health? Copenhagen,WHO Regional Office for Europe (Health Evidence Network report; http://www.euro.who.int/Document/E88086.pdf.	2006	Evaluation
Walters H, Capacity Development, Institutional Change and Theory of Change: What do we mean and where are the linkages A Conceptual background paper, 2007. http://portals.wi.wur.nl/files/docs/successfailuredevelopment/Walters_CapacityDevelopmentConceptPaperFIN.pdf	2007	Theory Article
Warburton D et al. A systematic review of the evidence for Canada’s Physical Activity Guidelines for Adults. International Journal of Behavioural Nutrition and Physical Activity, 2009 [under review for publication]. )	2009	Systematic Review
Wäsche, H., & Woll, A. (2010). Regional Sports Tourism Networks: A Conceptual Framework. Journal Of Sport & Tourism, 15(3), 191-214. doi:10.1080/14775085.2010.513146	2010	Theory Article
Watts P, Phillips G, Petticrew M, Harden A, Renton A, The influence of environmental factors on the generalisability of public health research evidence: physical activity as a worked example. Int J Behav Nutr Phys Act. 2011; 8: 128. Published online 2011 November 16. doi: 10.1186/1479-5868-8-128	2011	Theory Article				1
Weaver N, Williams JL, Weightman AL, Kitcher, HN, Temple JM, Jones P, Palmer S: Taking STOX: developing a cross disciplinary methodology for systematic reviews of research on the built environment and the health of the public. J Epidemiol Community Health 2002, 56(1):48-55.	2002	Method	1			1
Webster P, Lipp A.The evolution of the WHO city health profiles: a content review. Health Promot Int. 2009 Nov;24 Suppl 1:i56-i63.	2009	Review
Weed M: How will we know if the London 2012 Olympics and Paralympics benefit health? BMJ 2010, 340:c2202. doi: 10.1136/bmj.c2202.	2010	Evaluation	1
Weed M., Interpretive qualitative synthesis in the sport & exercise sciences: The meta-interpretation approach. European Journal of Sport Science, June 2006; 6(2): 127_139.**	2006	Systematic Review
Wehrens, Rik; Bekker, Marleen; Bal, Roland. The construction of evidence-based local health policy through partnerships: Research infrastructure, process, and context in the Rotterdam 'Healthy in the City' programme Journal of Public Health Policy31. 4 (Dec 2010): 447-60.	2011							1
Weiler R, Chew S, Coombs N, Hamer M, Stamatakis E: Physical activity education in the undergraduate curricula of all UK medical schools Are tomorrow's doctors equipped to follow clinical guidelines? Br J Sports Med 2012, 46:1024–1026. doi: 10.1136/bjsports-2012-091380.	2012	Evaluation	1
Weiner, B.J.a , Lewis, M.A.c, Clauser, S.B.d, Stitzenberg, K.B, In search of synergy: Strategies for combining interventions at multiple levels. Journal of the National Cancer Institute - Monographs Issue 44, 2012, Pages 34-41	2012	Theory Article
Wendel-Vos, W., Droomers, M., Kremers, S., Brug, J. and Van Lenthe, F. (2007), Potential environmental determinants of physical activity in adults: a systematic review. Obesity Reviews, 8: 425–440. doi: 10.1111/j.1467-789X.2007.00370.x (RECUP	2007	Systematic Review				1
While, A., Jonas, A. E. G., and Gibbs, D., 2004, The environment and the entrepreneurial city: Searching for the urban “sustainability fix” in Manchester and Leeds. International Journal of Urban and Regional Research, Vol. 28, 549–569.	2004					1		1
White House Task Force on Childhood Obesity. Report to the President. 2010. Available at: www.letsmove.gov/tfco_increasing_physical_activity. pdf. Accessed April 10, 2010.	2010							1
Whitelegg J (editor), Sustainable Transport that Works: Lessons from Germany Bicycle Education few or for everyone: Social Justice in Cycling Policy.World Transport Policy & Practice 2009, Vol15(1)	2009	Evaluation		WC
WHO, WHO Global strategy on diet, physical activity and health, A framework to monitor and evaluate implementation. Geneva, World Health Organization, 2008.	2008	Guidance
Wilcox S, Parra-Medina D, Thompson-Robinson M, Will J. Nutrition and physical activity interventions to reduce cardiovascular disease risk in health care settings: a quantitative review with a focus on women. Nutr Rev. 2001;59:197–214.	2001	Systematic Review
Will JC, Farris RP, Sanders CG, Stockmyer CK, Finkelstein EA. Health promotion interventions for disadvantaged women: overview of the WISEWOMAN projects. J Womens Health (Larchmt). 2004;13:484–502.	2004							1
Wolf K, Bauman A, Pratt M, Promoting physical activity globally for population health. Global Health Promotion13. 2 (2006): 90-1, 147-8, 154-5.	2006	Other
Wong G, Pawson R, Owen L. Policy guidance on threats to legislative interventions in public health: a realist synthesis. BMC Public Health 2011; 11: 222–32.	2011	Evaluation
Working for a healthier tomorrow: Dame Carol Black's Review .Publication date: 17/03/2008 . Cross-Government Health, Work and Well-being Programme. This report presents the outcomes of the review into the human, social and economic costs of impaired health and wellbeing in relation to working life in Britain	2008	Review
World Health Organisation. Interventions on Diet and Physcial Activity: What Works? Summary Report Geneva, Switzerland: World Health Organization; 2009.	2009	Evaluation
World Health Organization (2008), Review of Best Practice in Interventions to Promote Physical Activity in Developing Countries. Workshop on Physical Activity and Public Health 24–27 October 2005 Beijing, People’s Republic of China	2008	Systematic Review
World Health Organization (2010), Global recommendations on physical activity for health, World Health Organization http://www.who.int/dietphysicalactivity/factsheet_recommendations/en/index.html	2010	Guidance			x
World Health Organization Regional Office for Europe, Steps to health. A European Framework to Promote Physical Activity for Health, Copenhagen. 2007.	2007	Guidance
World Health Organization, Review of physical activity prompromotion policy development and legislation in European Union Member States, WHO Europa 2010, . Report n.10 http://www.politiquessociales.net/IMG/pdf/review-2.pdf	2010	Review
World Health Organization, A guide for population-based approaches to increasing levels of physical activity: implementation of the WHO Global Strategy on Diet, Physical Activity and Health. Geneva, World Health Organization, 2007	2007	Guidance
World Health Organization, Global Strategy on Diet, Physical Activity and Health, 2004 www.who.int/dietphysicalactivity http://www.who.int/dietphysicalactivity/pa/en/index.html	2004	Guidance
World Health Organization, Guide for Population-based Approaches to Increasing Levels of Physical Activity, 2007.http://www.who.int/dietphysicalactivity/PA-promotionguide-2007.pdf	2007	Guidance
World Health Organization, Interventions on diet and physical activity: what works: summary report. Geneva, World Health Organization, 2009. http://www.who.int/dietphysicalactivity/publications/pa/en/index.html (396 rif biblio su valutazioni di interventions)	2009	Systematic Review
World Health Organization, Population-based prevention strategies for childhood obesity: report of a WHO forum and technical meeting, Geneva, 15–17December 2009. WHO 2010. www.who.int/dietphysicalactivity/childhood/child-obesity-eng.pdf	2010	Guidance
World Health Organization: Bridging the “Know-Do” gap: Meeting on knowledge translation in global health. Geneva, Switzerland: World Health Organization; 2006. http://www.who.int/kms/WHO_EIP_KMS_2006_2.pdf [last accessed 16 May 2016]	2006	Method					1
World Health Organization: Global health risks: mortality and burden of disease attributable to selected major risks. Geneva, Switzerland: World Health Organization; 2009. http://www.who.int/healthinfo/global_burden_disease/GlobalHealthRisks_report_full.pdf [last accessed 16 May 2016]	2009	Evaluation	1
World Health Organization: Promoting sport and enhancing health in European Union countries: a policy content analysis to support action. WHO Regional Office for Europe, Copenhagen, Denmark, 2011. http://www.euro.who.int/__data/assets/pdf_file/0006/147237/e95168.pdf [last accessed 16 May 2016]	2011	Evaluation	1
Woulfe J, Oliver TR,Zahner SJ, Siemering KQ. Multisector partnerships in population health improvement. Prev Chronic Dis 2010;7(6).http://www.cdc.gov/pcd/issues/nov/10_0104.htm.	2010							1
Yancey A K, Ory M G, Davis S M, Dissemination of Physical Activity Promotion Interventions in Underserved Populations. American journal of preventive medicine, 2006 Volume 31, Issue 4, Supplement ,82-91.	2006	Evaluation
Yancey AK, Fielding JE, Flores GR, Sallis JF, McCarthy WJ, Breslow L, Creating a Robust Public Health Infrastructure for Physical Activity Promotion, « Previous Next » American Journal of Preventive Medicine, 2007, Volume 32, Issue 1 ,68-78.	2007	Other
Yancey AK, Marcia OG, Sally DM. Dissemination of Physical Activity Promotion Interventions in Underserved Populations. Am J Prev Med 2006;31(4S)pp. 82-91	2006	Other
Yang L, Shannon Sahlqvist, Alison McMinn, Simon J Griffin, Ogilvie D.,Interventions to promote cycling: systematic review, BMJ. 2010; 341: c5293. Published online 2010 October 18. doi: 10.1136/bmj.c5293.	2010	Systematic Review		WC	x
Young, W. and Middlemiss, L. 2012. A rethink of how policy and social science approach changing individuals actions on greenhouse gas emissions. Energy Policy, 41, p. 742-747.	2012	Theory Article
Zakocs RC, Edwards EM. What explains community coalition effectiveness? A review of the literature. Am J Prev Med 2006;30(4):351-61.	2006	Review
Zandieh R, Flacke J, Martinez J, Jones P, van Maarseveen M. Do Inequalities in Neighborhood Walkability Drive Disparities in Older Adults' Outdoor Walking? Int J Environ Res Public Health. 2017 Jul 7;14(7). pii: E740. doi: 10.3390/ijerph14070740.
Zhu D, Norman IJ and While AE: The relationship between health professionals’ weight status and attitudes towards weight management: a systematic review. Obes Rev 2011, 12(5):e324–e337. doi: 10.1111/j.1467-789X.2010.00841.x.	2011	Systematic review	1
Zhu X, Lee C, Kwok O, Varni JW (2011), Context-Specific Correlates of Walking Behaviors to and From School: Do They Vary Across Neighborhoods and Populations?, Journal of Physical Activity and Health, 2011, 8(Suppl 1), S59-S71.	2011	Evaluation		W
Zhu X, Lee, C. Correlates of Walking to School and Implications for Public Policies: Survey Results from Parents of Elementary School Children in Austin, Texas Journal of Public Health Policy, suppl. SUPPLEMENT 1: Connecting Active Living Research to Policy.. 30 (2009): S177-202.Premi il tasto Escape per chiudere	2009	Evaluation		WC
